## SUBJECT INDEX TO VOLUME 64

Subject entries for all materials in the JOURNAL appear in this index. Entries from the JOURNAL departments are identified as follows: Book Reviews—(BR); Clinical Reports—(CR); Correspondence—(CO); Editorial Views—(EV); Laboratory Reports—(LR); Original Article—(OA); Review Article—(RA); Medical Intelligence—(MI); Special Article—(SA); Reports of Scientific Meetings—(SM).

### A

#### Academics

anesthesiology, status of women in (SA) [Wilkinson & Linde], 496

Acetylcholine, *See under Neurotransmitters; Receptors*

#### Acid analogues

##### baclofen

during general anesthesia, bradycardia and hypotension associated with (CR) [Sill, Schumacher, Southorn, Reuter & Yaksh], 255

#### Acid-base equilibrium

##### respiratory acidosis

in response to moderate changes in  $P_{aCO_2}$  after cardiopulmonary bypass (OA) [Salmenperä & Heinonen], 311

##### respiratory alkalosis

in response to moderate changes in  $P_{aCO_2}$  after cardiopulmonary bypass (OA) [Salmenperä & Heinonen], 311

Action potential, *See under Heart*

Adenosine, *See under Anesthetic techniques, hypotension, induced*

Adrenal medulla, *See under Sympathetic nervous system*

Adrenergic receptors, *See under Receptors; Sympathetic nervous system*

#### Aerosols

bronchodilator, delivery of, in anesthesia circuit (CO) [Diamond], 531

Afterload, *See under Heart*

#### Age factors

##### prematurity

and cardiovascular changes in neonates receiving isoflurane, halothane, fentanyl, and ketamine (OA) [Friesen & Henry], 238

AIDS, *See under Complications*

Air embolism, *See under Embolism*

Airway, *See also under Muscle*

##### perforation

following laser surgery (CR) [Emery], 120

##### resistance

to histamine following general anesthesia (OA) [Amyot, Michoud, St-Jean, Champleau & Couture], 758

tubular, response to, in normal subjects and postoperative patients (OA) [Weissman, Askanazi, Rosenbaum, Damask, Hyman & Kinney], 353

rupture with disposable double-lumen tube (CO) [Brodsky, Shulman & Mark], 415

##### suctioning

effect of lidocaine on ICP response to (CR) [Yano, Nishiyama, Yokota, Kato, Yamamoto & Otsuka], 651

##### tongue

hemimacroglossia and unilateral necrosis of, in long-duration neurosurgical procedure, 845

Airway occlusion pressure, *See under Ventilation*

Airway pressure, *See under Monitoring*

Airway response, *See under Histamine*

Alarms, *See under Complications; Equipment; Monitoring*

#### Alcohols

in study of general anesthetics on acetylcholine receptor-rich membranes from *Torpedo californica* (OA) [Firestone, Sauter, Branswell & Miller], 694

Alcuronium, *See under Neuromuscular relaxants*

Alfentanil, *See under Analgesics, narcotic; Anesthetics, intravenous*

Alpha-adrenergic agonist, *See under Sympathetic nervous system*

Amines, *See under Anesthetics, local*

Amino acids, *See under Brain; Liver*

Amniotic fluid, *See under Embolism*

#### Analgesics

##### alfentanil

concentration versus effects in dogs (OA) [Arndt, Bednarski & Parasher], 345

rigidity induced by, physiology of (OA) [Benthuyssen, Smith, Sanford, Head & Dec-Silver], 440

##### fentanyl

potency *versus* cost of (CO) [Aldrete], 843

potency *versus* cost of (CO) [Marina], 842

potency *versus* cost of (CO) [Polta], 843

##### intravenous

###### meperidine

effects of, on hemodynamics, plasma catecholamines, angiotensin I, aldosterone, and histamine concentrations in elderly men (CR) [Cozian, Pinaud, Lepage, Lhoste & Souron], 815

##### methadone

and morphine, compared in postoperative pain control (OA) [Gourlay, Willis & Lamberty], 322

##### morphine

cardiac pain induced by? (CO) [Maltby & Williams], 527

and methadone, compared in postoperative pain control (OA) [Gourlay, Willis & Lamberty], 322

##### narcotic

###### alfentanil

intrathecally administered in rat and cat, studies of pharmacology and pathology of (OA) [Yaksh, Noueihed & Durant], 54

###### buprenorphine

early respiratory depression resistant to naloxone following (CR) [Knape], 382

###### complications

resistant to naloxone following epidural buprenorphine (CR) [Knape], 382

###### fentanyl

epidural injections of, in chronically implanted rats (OA) [Durant & Yaksh], 43

intrathecally administered in rat and cat, studies of pharmacology and pathology of (OA) [Yaksh, Noueihed & Durant], 54

in patients undergoing abdominal aortic surgery (OA) [Hudson, Thomson, Cannon, Friesen & Meatherall], 334

- prolonged antagonism of opioid action with intravenous nal-mefene in man (OA) [Gal & DiFazio], 175
- lofentanil**  
epidural injections of, in chronically implanted rats (OA) [Durant & Yaksh], 43  
intrathecally administered in rat and cat, studies of pharmacology and pathology of (OA) [Yaksh, Noueihed & Durant], 54
- morphine**  
epidural injections of, in chronically implanted rats (OA) [Durant & Yaksh], 43  
influence of naloxone on analgesia and respiratory depression following (OA) [Rawal, Schött, Dahlström, Inturrisi, Tandon, Sjöstrand & Wennhager], 194  
intrathecally administered in rat and cat, studies of pharmacology and pathology of (OA) [Yaksh, Noueihed & Durant], 54  
potency *versus* cost of (CO) [Aldrete], 843  
potency *versus* cost of (CO) [Marina], 842  
potency *versus* cost of (CO) [Polta], 843
- respiratory depression**  
resistant to naloxone following epidural buprenorphine (CR) [Knape], 382
- sufentanil**  
intrathecally administered in rat and cat, studies of pharmacology and pathology of (OA) [Yaksh, Noueihed & Durant], 54
- tolerance**  
in epidural injections in chronically implanted rats (OA) [Durant & Yaksh], 43
- nonnarcotic**  
**aspirin**  
usefulness of post-aspirin bleeding time in use of (CR) [Hindman & Koka], 368
- sufentanil**  
effects of, on spinal pain-transmission neurons in cats (OA) [Aoki, Senami, Kitahata & Collins], 225  
potency *versus* cost of (CO) [Aldrete], 843  
potency *versus* cost of (CO) [Marina], 842  
potency *versus* cost of (CO) [Polta], 843
- Analyzers, See under Equipment**  
**Anesthesia, See also under History; Induction**
- cardiac**  
and barbiturate cerebral protection during cardiopulmonary bypass (OA) [Nussmeier, Arlund & Slogoff], 165  
and intraoperative tension pneumopericardium with tamponade after ligation of patent ductus arteriosus in premature neonate (CR) [Hickey], 641
- cardiovascular**  
and barbiturate-induced brain protection in man (EV) [Michenfelder], 140  
halothane in, and myocardial ischemia (OA) [Buffington], 632
- cardiovascular effects**  
in preterm neonates (OA) [Friesen & Henry], 238
- costs**  
differences in (CO) [Aldrete & Hendricks], 656
- history**  
in military surgery (CO) [Tverskoy], 661
- libraries, departmental**  
dyscosmesis delays disappearance (CO) [Smith], 133
- military**  
history of (CO) [Tverskoy], 661
- morbidity**  
fetal, and surgery during pregnancy (OA) [Duncan, Pope, Cohen & Greer], 790
- neurosurgical**  
and intraoperative glucose during neurosurgery (OA) [Sieber, Smith, Kupferberg, Crosby, Uzzell, Buzby, March & Nann], 453  
isoflurane and intracranial pressure during (CO) [Finck], 833  
isoflurane and intracranial pressure during (CO) [Grosslight & Bedford], 834  
long-duration, hemimacroglossia and unilateral ischemic necrosis of tongue in (CO) [Teepie, Maroon & Rueger], 845  
PEEP, air embolism, and atrial pressures during (OA) [Pearl & Larson], 724
- obstetric**  
**cesarean section**  
bilateral uterine displacement device for (CO) [Curmarnik & Horowitz], 654  
for cesarean section in patients with genital herpes infections (CR) [Ramanathan, Sheth & Turndorf], 807  
epinephrine for, in gravid ewes (OA) [Hood, Dewan & James], 610  
peripartum, succinylcholine pharmacodynamics in (OA) [Leighton, Cheek, Gross, Apfelbaum, Shantz, Gutsche & Rosenberg], 202  
should end-tidal P<sub>CO<sub>2</sub></sub> be standard of care for? (CO) [Choi, Tremper & Garber], 829  
and surgery, fetal risk of (OA) [Duncan, Pope, Cohen & Greer], 790  
trimethaphan for use in preeclampsia during (CO) [Sosis & Leighton], 657
- ophthalmic**  
lidocaine in, for control of coughing during standby cataract surgery (CO) [Fenton], 847  
phenylephrine eyedrops and (CR) [Van Der Spek & Hantler], 812
- outpatient**  
for infants during radiotherapy: an insufflation technique (CR) [Brett, Wara & Hamilton], 402
- pediatric**  
continuous infusion of atracurium in (OA) [Goudsouzian, Martyn, Rudd, Liu & Lineberry], 171  
difficult, fiberoptic bronchoscope in (CO) [Berthelsen & Jacobsen], 668  
difficult, fiberoptic bronchoscope in (CO) [Laravuso & Perloff], 668  
hemodynamic and cardiovascular effects of isoflurane and halothane in (OA) [Wolf, Neal & Peterson], 328  
for acute epiglottitis (CO) [Williams], 663  
for infants during radiotherapy: an insufflation technique (CR) [Brett, Wara & Hamilton], 402  
and intraoperative tension pneumopericardium with tamponade after ligation of patent ductus arteriosus in premature neonate (CR) [Hickey], 641
- mask induction**  
"fruit-flavored," for children (CO) [Yamashita & Motokawa], 837  
in midline facial defects, method to secure endotracheal tube for (CR) [Jobes & Nicolson], 643  
preterm neonates using isoflurane, halothane, fentanyl, and ketamine, cardiovascular changes in (OA) [Friesen & Henry], 238  
sensitivity of neonatal rat atrial contraction to (OA) [Rao, Boyer, Krishna & Paradise], 13  
and simple method for warming intravenous fluid in infants (CO) [Rosen, Rosen & Broadman], 133  
spinal, in premature infants recovering from respiratory distress

- syndrome (CR) [Harnik, Hoy, Potolicchio, Stewart & Siegelman], 95
- tracheo-bronchial angles in infants and children and (CR) [Kubota, Toyoda, Nagata, Kubota, Sawada, Murakawa & Fujimori], 374
- potency**
- fentanyl**
- and cost of (CO) [Marina], 842
- versus* cost of (CO) [Polta], 843
- sufentanil**
- and cost (CO) [Aldrete], 843
- and cost (CO) [Marina], 842
- versus* cost of (CO) [Polta], 843
- pregnancy**
- and surgery, fetal risk of (OA) [Duncan, Pope, Cohen & Greer], 790
- radiation therapy**
- and remote monitoring for (CR) [Bashein, Russell & Momii], 804
- surgical**
- introduction of (CO) [Fink], 296
- teratology**
- and surgery during pregnancy (OA) [Duncan, Pope, Cohen & Greer], 790
- therapeutic**
- epidural blood patch (CR) [Szeinfeld, Ihmeidan, Moser, Machado, Klose & Serafini], 820
- thoracic**
- end-tidal CO<sub>2</sub> analyzers in proper positioning of double-lumen tubes (CO) [Shafieha, Sit, Kartha, Sabnis, Hajianpour, Pappas, Yu, Elam & Balagot], 844
- tip of double-lumen endotracheal tube wedged in left lower lobe bronchus (CO) [Greene & Gutierrez], 406
- Anesthesia records, *See under* Records**
- Anesthesiologists**
- women, status of, in academic anesthesiology (SA) [Wilkinson & Linde], 496
- Anesthesiology**
- academic, status of women in (SA) [Wilkinson & Linde], 496
- Anesthetic**
- volatile**
- halothane**
- does not alter left ventricular compliance (OA) [Greene & Gerson], 230
- Anesthetic techniques**
- blood patch**
- epidural (CR) [Szeinfeld, Ihmeidan, Moser, Machado, Klose & Serafini], 820
- continuous infusion**
- alfentanil and fentanyl compared in, for outpatient anesthesia (CR) [White, Coe, Shafer & Sung], 99
- midazolam in, in intensive care unit (CR) [Shapiro, Westphal, White, Sladen & Rosenthal], 394
- endobronchial**
- tip of double-lumen endotracheal tube wedged in left lower lobe bronchus (CO) [Greene & Gutierrez], 406
- endobronchial intubation**
- proper positioning of double-lumen tubes, end-tidal CO<sub>2</sub> analyzers in (CO) [Shafieha, Sit, Kartha, Sabnis, Hajianpour, Pappas, Yu, Elam & Balagot], 844
- endotracheal**
- blind (CO) [Shapiro & Unger], 297
- using lighted stylet, compared with direct laryngoscopic technique (CR) [Ellis, Jakymec, Kaplan, Stewart, Freeman, Bleyaert & Berkebile], 823
- epidural**
- benefits of continuous intercostal nerve block over (CO) [Middaugh, Bauman & Menk], 670
- benefits of continuous intercostal nerve block over (CO) [Murphy], 669
- for chronic pain management facilitated by field block (CO) [Catchlove], 536
- comparison of lidocaine hydrocarbonate and lidocaine hydrochloride for (CO) [Bromage & Nickel], 126
- comparison of lidocaine hydrocarbonate and lidocaine hydrochloride for (CO) [Cole & McMorland], 126
- epinephrine for intravenous placement in, effects of, in gravid ewes (OA) [Hood, Dewan & James], 610
- method to prevent heel sores during (CO) [Brighthouse], 536
- morphine in, influence of naloxone on analgesia and respiratory depression following (OA) [Rawal, Schött, Dahlström, Inturrisi, Tandon, Sjöstrand & Wennhager], 194
- subdural catheterized in—probably not (CO) [Redick], 838
- subdural catheterized in—probably not (CO) [Stevens], 839
- subdural catheterized in—probably not (CO) [West], 838
- of test dose containing epinephrine, monitoring maternal heart rate during (CO) [Chestnut & Wiener], 839
- and venous return, influence on baroreflex control of heart rate (OA) [Baron, Decaux-Jacotot, Edouard, Berdeaux & Samii], 188
- epidural narcotic**
- in chronically implanted rats: pharmacologic and pathologic study (OA) [Durant & Yaksh], 43
- hypotension**
- isoflurane-induced, effect of, on cerebral blood flow and cerebral metabolic rate for oxygen (OA) [Newman, Gelb & Lam], 307
- hypotension, induced**
- adenosine**
- cerebral oxygen tension in rats during (OA) [Seyde & Longnecker], 480
- nitroprusside**
- cerebral oxygen tension in rats during (OA) [Seyde & Longnecker], 480
- infiltration**
- for chronic pain management facilitated by field block (CO) [Catchlove], 536
- insufflation**
- anesthesia for infants during radiotherapy (CR) [Brett, Wara & Hamilton], 402
- intrathecal**
- in studies of pharmacology and pathology of 4-anilinopiperidine analogues and morphine in rat and cat (OA) [Yaksh, Noueihed & Durant], 54
- intravenous regional**
- for surgery on foot and ankle (CR) [Nusbaum & Hamelberg], 91
- intubation technique**
- tip of double-lumen endotracheal tube wedged in left lower lobe bronchus (CO) [Greene & Gutierrez], 406
- lighted stylet**
- guided orotracheal intubation using, comparison with direct laryngoscopic technique (CR) [Ellis, Jakymec, Kaplan, Stewart, Freeman, Bleyaert & Berkebile], 823
- lumbar**
- for obstetrics, efficacy of 1.5% lidocaine with 7.5% dextrose and epinephrine in (CR) [Abraham, Harris, Maxwell & Kaplow], 116
- lumbar epidural**
- blood patch (CR) [Szeinfeld, Ihmeidan, Moser, Machado, Klose & Serafini], 820

- mask induction**  
"fruit-flavored," for children (CO) [Yamashita & Motokawa], 837
- opiate**  
in studies of pharmacology and pathology of 4-anilinopiperidine analogues and morphine in rat and cat (OA) [Yaksh, Noueihed & Durant], 54
- orotracheal**  
guided, using lighted stylet, comparison with direct laryngoscopic technique (CR) [Ellis, Jakymec, Kaplan, Stewart, Freeman, Bleyaert & Berkebile], 823
- peridural**  
**lumbar**  
buprenorphine in, early respiratory depression resistant to naloxone following (CR) [Knapc], 382  
for obstetrics, efficacy of 1.5% lidocaine with 7.5% dextrose and epinephrine in (CR) [Abraham, Harris, Maxwell & Kaplow], 116
- priming principle**  
refining of, for vecuronium during rapid-sequence induction of anesthesia (OA) [Taboada, Rupp & Miller], 243
- puncture**  
percutaneous, of internal jugular vein, real-time ultrasonic guidance for (CO) [Yonei, Nonoue & Sari], 830
- rapid sequence**  
refining priming principle for vecuronium during (OA) [Taboada, Rupp & Miller], 243
- regional**  
**brachial plexus block**  
incidence of Horner syndrome with (CO) [Al-Khafaji & Elias], 127  
for chronic pain management facilitated by field block (CO) [Catchlove], 536
- intercostal**  
continuous (CO) [Middaugh, Bauman & Menk], 670  
continuous (CO) [Murphy], 669
- intravenous**  
confusion regarding experimental studies of (CO) [Grice, Morrell & Balestrieri], 526
- stellate block**  
seizure following, after negative aspiration and test dose (CO) [Ellis & Ramamurthy], 533
- spinal**  
for chronic pain management facilitated by field block (CO) [Catchlove], 536  
with meperidine, effects in elderly men (CR) [Cozian, Pinaud, Lepage, Lhoste & Souron], 815  
in premature infants recovering from respiratory distress syndrome (CR) [Harnik, Hoy, Potolicchio, Stewart & Siegelman], 95  
and prolonged diabetes insipidus subsequent to chemical meningitis (CR) [Garfield, Andriole, Vetto & Richie], 253
- spinal narcotics**  
sufentanil in, effects on spinal pain-transmission neurons in cats (OA) [Aoki, Senami, Kitahata & Collins], 225
- sympathetic block**  
**neurolytic**  
in Raynaud's phenomenon (CR) [Skeehan & Cory], 119
- Anesthetic toxicity, See under Toxicity**
- Anesthetics**  
**gases**  
**nitrous oxide**  
carcinogen bioassay of, in mice (OA) [Baden, Kundomal, Luttrupp, Mazze & Kosek], 747  
cell proliferation in developing brain after brief exposure to (OA) [Rodier, Aschner, Lewis & Koeter], 680  
influence of, on methionine, S-adenosylmethionine and other amino acids (OA) [Viña, Davis & Hawkins], 490  
reproductive and teratogenic effects of, in Sprague-Dawley rats (OA) [Mazze, Fujinaga, Rice, Harris & Baden], 339  
in study of power spectrum changes during induction with enflurane (OA) [Levy], 688
- intravenous**  
**alfentanil**  
and fentanyl compared for outpatient anesthesia (CR) [White, Coe, Shafer & Sung], 99  
rigidity induced by, physiology of (OA) [Benthuysen, Smith, Sanford, Head & Dec-Silver], 440
- diazepam**  
variability of respiratory response to (OA) [Bailey, Andriano, Goldman, Stanley & Pace], 460
- droperidol**  
pharmacokinetics of, in anesthetized patients (OA) [Fischler, Bonnet, Trang, Jacob, Levron, Flaisler & Vourc'h], 486
- etomidate**  
regional brain glucose utilization in rats during (OA) [Davis, Mans, Biebuyck & Hawkins], 751
- fentanyl**  
and alfentanil compared for outpatient anesthesia (CR) [White, Coe, Shafer & Sung], 99  
coronary perfusion scans during anesthetic induction using (OA) [Kleinman, Henkin, Glisson, El-Etr, Bakhos, Sullivan, Montoya & Pifarre], 157  
induction of, effects of clonidine on narcotic requirements and hemodynamic response during (OA) [Ghignone, Quintin, Duke, Kehler & Calvillo], 36  
interchanging of, with sufentanil, potential hazard of (CO) [Griffiths], 410  
interchanging of, with sufentanil, potential hazard of (CO) [Ward & Sanford], 410  
and pancuronium and myocardial ischemia (CO) [Levy], 659  
and pancuronium and myocardial ischemia (CO) [Thomson & Putnins], 660  
in patients undergoing abdominal aortic surgery (OA) [Hudson, Thomson, Cannon, Friesen & Meatherall], 334  
potency *versus* cost of (CO) [Polta], 843  
prophylactic nitroglycerin during coronary artery bypass surgery with (OA) [Gallagher, Moore, Jose, Botros & Clark], 785  
in study of potency *versus* cost of narcotics (CO) [Aldrete], 843  
in study of potency *versus* cost of narcotics (CO) [Marina], 842
- flunitrazepam**  
physostigmine antagonism of acute intoxication by (OA) [Vatashsky, Beilin, Razin & Weinstock], 248
- ketamine**  
induction and intubation, heart rate and blood pressure effects of esmolol after (OA) [Gold, Brown, Coverman & Herrington], 718  
and monitoring for pediatric radiation therapy (CO) [Davies], 406
- ketamine isomers**  
differential effects of, on neuronal and extraneuronal catecholamine uptake mechanisms (LR) [Lundy, Lockwood, Thompson & Frew], 359
- midazolam**  
effects of, on coronary circulation, in coronary artery disease (OA) [Marty, Nitenberg, Blanchet, Zouioueche & Desmonts], 206  
for sedation in intensive care unit (CR) [Shapiro, Westphal, White, Sladen & Rosenthal], 394

**morphine**

cardiac pain induced by? (CO) [Maltby & Williams], 527

**sufentanil**

interchanging of, with fentanyl, potential hazard of (CO) [Griffiths], 410

interchanging of, with fentanyl, potential hazard of (CO) [Ward & Sanford], 410

potency of (CO) [Goldberg & McKenna], 667

potency of (CO) [Griffiths], 667

potency of (CO) [Hilberman & Hyer], 665

potency *versus* cost of (CO) [Polta], 843

in study of potency *versus* cost of narcotics (CO) [Aldrete], 843

in study of potency *versus* cost of narcotics (CO) [Marina], 842

with vecuronium, rapid administration of, bradycardia and asystole following (CR) [Starr, Sethna & Estafanous], 521

**thiameylal**

prolonged hyporesponsiveness of airway smooth muscle to histamine following (OA) [Amyot, Michoud, St-Jean, Chapleau & Couture], 758

**thiopental**

for cerebral protection during cardiopulmonary bypass (OA) [Nussmeier, Arlund & Slogoff], 165

in demonstration of barbiturate-induced brain protection in man (EV) [Michenfelder], 140

**local**

administered topically: sterile or not? (CO) [Halevy], 535

**amides**

in malignant hyperthermia (CO) [Moore], 294

**benzocaine**

dual effect of, on rhodopsin (OA) [Mashimo, Abe & Yoshiya], 447

methemoglobinemia induced by, in Sprague-Dawley rats (CO) [Engelbach & Harp], 132

**bupivacaine**

dual effect of, on rhodopsin (OA) [Mashimo, Abe & Yoshiya], 447

epidural injections of, in chronically implanted rats (OA) [Durant & Yaksh], 43

neurotoxicity of: altered perineurial permeability, edema, and nerve fiber injury (OA) [Myers, Kalichman, Reisner & Powell], 29

**chloroprocaine**

neurotoxicity of: altered perineurial permeability, edema, and nerve fiber injury (OA) [Myers, Kalichman, Reisner & Powell], 29

**cocaine**

in comparative study, of dilation of nasal passage (CR) [Sessler, Vitaliti, Cooper, Jones, Powell & Pesko], 274

and introduction of surgical local anesthesia (CO) [Fink], 296

**dibucaine**

dual effect of, on rhodopsin (OA) [Mashimo, Abe & Yoshiya], 447

**esters**

in malignant hyperthermia (CO) [Moore], 294

and introduction of surgical local anesthesia (CO) [Fink], 296

**lidocaine**

1.5%, with 7.5% dextrose and epinephrine, efficacy of, as test dose for obstetrics (CR) [Abraham, Harris, Maxwell & Karpow], 116

in comparative study, of dilation of nasal passage (CR) [Sessler, Vitaliti, Cooper, Jones, Powell & Pesko], 274

for control of coughing during standby cataract surgery (CO) [Fenton], 847

depresses synaptic activity in rat hippocampal slice (LR) [Schurr, Spears, Reid, West, Edmonds & Rigor], 501

dual effect of, on rhodopsin (OA) [Mashimo, Abe & Yoshiya], 447

effect of, on ICP response to endotracheal suctioning (CR) [Yano, Nishiyama, Yokota, Kato, Yamamoto & Otsuka], 651

effects of myocardial contractility and baroreflex control of heart rate in dogs (OA) [Edouard, Berdeaux, Langlois, Samii, Giudicelli & Noviant], 316

neurotoxicity of: altered perineurial permeability, edema, and nerve fiber injury (OA) [Myers, Kalichman, Reisner & Powell], 29

seizures induced by, local cerebral blood flow during (OA) [Tommasino, Maekawa & Shapiro], 771

**lidocaine hydrocarbonate**

and lidocaine hydrochloride, compared for epidural blockade (CO) [Bromage & Nickel], 126

and lidocaine hydrochloride, compared for epidural blockade (CO) [Cole & McMorland], 126

**lidocaine hydrochloride**

and lidocaine hydrocarbonate, compared for epidural blockade (CO) [Bromage & Nickel], 126

and lidocaine hydrocarbonate, compared for epidural blockade (CO) [Cole & McMorland], 126

**test dose**

for obstetrics, efficacy of 1.5% lidocaine with 7.5% dextrose and epinephrine as (CR) [Abraham, Harris, Maxwell & Karpow], 116

**tetracaine**

dual effect of, on rhodopsin (OA) [Mashimo, Abe & Yoshiya], 447

neurotoxicity of: altered perineurial permeability, edema, and nerve fiber injury (OA) [Myers, Kalichman, Reisner & Powell], 29

**potency****fentanyl**

and cost (CO) [Aldrete], 843

**volatile****enflurane**

biotransformation of, in patients with hyperthyroidism (CR) [Servin, Nivoche, Desmonts, Rice & Mazze], 387

and calcium blocking drugs in chronically instrumented dogs, cardiovascular effects of and interaction between (OA) [Rogers, Hysing, Merin, Taylor, Hartley & Chelly], 568

conscious-state comparisons of effects of, on specialized atrioventricular conduction times in dogs (OA) [Atlee, Brownlee & Burstrom], 703

differences in costs of (CO) [Aldrete & Hendricks], 656

differential depression of myocardial contractility by, in vitro (OA) [Lynch], 620

inhibition of neutrophil cidal activity by (EV) [Welch], 1

inhibition of superoxide production and  $\text{Ca}^{2+}$  mobilization by (OA) [Nakagawara, Takeshige, Takamatsu, Takahashi, Yoshitake & Minakami], 4

postoperative hepatic dysfunction after, in hyperthyroidism (CR) [Seino, Dohi, Aiyoshi, Mizutani, Nakamura & Naito], 122

power spectrum correlates of changes in consciousness during anesthetic induction with (OA) [Levy], 688

reproductive and teratogenic effects of, in Sprague-Dawley rats (OA) [Mazze, Fujinaga, Rice, Harris & Baden], 339

sensitivity of neonatal rat atrial contraction to (OA) [Rao, Boyer, Krishna & Paradise], 13

**ether**

anesthesia with, in military surgery, history of (CO) [Tverskoy], 661

# halothane

- biotransformation of, in patients with hyperthyroidism (CR) [Servin, Nivoche, Desmonts, Rice & Mazze], 387
- and calcium blocking drugs in chronically instrumented dogs, cardiovascular effects of and interaction between (OA) [Chelly, Rogers, Hysing, Taylor, Hartley & Merin], 560
- cell proliferation in developing brain after brief exposure to (OA) [Rodier, Aschner, Lewis & Koeter], 680
- conscious-state comparisons of effects of, on specialized atrio-ventricular conduction times in dogs (OA) [Atlee, Brownlee & Burstrom], 703
- coronary perfusion scans during anesthetic induction using (OA) [Kleinman, Henkin, Glisson, El-Etr, Bakhos, Sullivan, Montoya & Pifarre], 157
- and cyclophosphamide, concomitant use of, failure to detect toxicity with (CR) [Lee, Erbguth & Stevens], 810
- differences in costs of (CO) [Aldrete & Hendricks], 656
- differential depression of myocardial contractility by, in vitro (OA) [Lynch], 620
- effect of, on diaphragmatic function (OA) [Clerque, Viïres, Lemesle, Aubier, Viars & Pariente], 181
- hemodynamic and cardiovascular effects of, in children (OA) [Wolf, Neal & Peterson], 328
- impaired systolic thickening associated with, in coronary stenosis mediated by changes in hemodynamics (OA) [Buffington], 632
- for infants during radiotherapy: an insufflation technique (CR) [Brett, Wara & Hamilton], 402
- inhibition of neutrophil cidal activity by (EV) [Welch], 1
- inhibition of receptor-mediated calcium influx (OA) [Yashima, Wada & Izumi], 466
- inhibition of superoxide production and  $Ca^{2+}$  mobilization by (OA) [Nakagawara, Takeshige, Takamatsu, Takahashi, Yoshitake & Minakami], 4
- membrane fluidizing effect of (OA) [Ueda, Hirakawa, Arakawa & Kamaya], 67
- postoperative hepatic dysfunction after, in hyperthyroidism (CR) [Seino, Dohi, Aiyoshi, Mizutani, Nakamura & Naito], 122
- prolonged hyporesponsiveness of airway smooth muscle to histamine following (OA) [Amyot, Michoud, St-Jean, Chapleau & Couture], 758
- and regional cerebral blood flow at various levels of  $Pa_{CO_2}$  in rabbits (OA) [Scheller, Todd & Drummond], 598
- reproductive and teratogenic effects of, in Sprague-Dawley rats (OA) [Mazze, Fujinaga, Rice, Harris & Baden], 339
- sensitivity of neonatal rat atrial contraction to (OA) [Rao, Boyer, Krishna & Paradise], 13
- ventilatory compensation for continuous inspiratory resistive and elastic loads during (OA) [Moote, Knill & Clement], 582

# isoflurane

- adrenoceptor interaction in isolated rat parotid gland (OA) [Östman, Henriksson, Sundström & Reiz], 734
- and arterial oxygenation during one-lung ventilation (EV) [Benumof], 419
- and calcium blocking drugs in chronically instrumented dogs, cardiovascular effects of and interaction between (OA) [Rogers, Hysing, Merin, Taylor, Hartley & Chelly], 568
- cerebral oxygen tension in rats during deliberate hypotension with (OA) [Seyde & Longnecker], 480
- conscious-state comparisons of effects of, on specialized atrio-ventricular conduction times in dogs (OA) [Atlee, Brownlee & Burstrom], 703
- differences in costs of (CO) [Aldrete & Hendricks], 656

- differential depression of myocardial contractility by, in vitro (OA) [Lynch], 620
- hemodynamic and cardiovascular effects of, in children (OA) [Wolf, Neal & Peterson], 328
- hypotension induced by, effect of, on cerebral blood flow and cerebral metabolic rate for oxygen (OA) [Newman, Gelb & Lam], 307
- improves tolerance to pacing-induced myocardial ischemia (OA) [Tarnow, Marksches-Hornung & Schulte-Sasse], 147
- for infants during radiotherapy: an insufflation technique (CR) [Brett, Wara & Hamilton], 402
- influence of, on hypoxic pulmonary vasoconstriction in dogs (OA) [Domino, Borowec, Alexander, Williams, Chen, Marshall & Marshall], 423
- inhibition of neutrophil cidal activity by (EV) [Welch], 1
- inhibition of superoxide production and  $Ca^{2+}$  mobilization by (OA) [Nakagawara, Takeshige, Takamatsu, Takahashi, Yoshitake & Minakami], 4
- and intracranial pressure (CO) [Finck], 833
- and intracranial pressure (CO) [Grosslight & Bedford], 834
- in near-complete forebrain ischemia in rat (OA) [Warner, Deshpande & Wieloch], 19
- and oxyhemoglobin dissociation curve in humans (CO) [Lanza & Mercadante], 413
- and regional cerebral blood flow at various levels of  $Pa_{CO_2}$  in rabbits (OA) [Scheller, Todd & Drummond], 598
- reproductive and teratogenic effects of, in Sprague-Dawley rats (OA) [Mazze, Fujinaga, Rice, Harris & Baden], 339
- sensitivity of neonatal rat atrial contraction to (OA) [Rao, Boyer, Krishna & Paradise], 13
- in study of general anesthetics on acetylcholine receptor-rich membranes from *Torpedo californica* (OA) [Firestone, Sauter, Braswell & Miller], 694
- and verapamil, combined effects of, on coronary blood flow and myocardial metabolism (OA) [Campos & Kapur], 778

# Antagonists

- of atracurium, level of paralysis recovery for with moderate doses of edrophonium (CR) [Hennart, d'Hollander, Plasman & De Jonckheere], 384

# narcotic

## nalmefene

- prolonged opioid antagonism with (OA) [Gal & DiFazio], 175

## naloxone

- antagonizes agonist effects of morphine, fentanyl, and lofentanil in chronically implanted rats (OA) [Durant & Yaksh], 43
- influence of, on analgesia and respiratory depression following epidural morphine (OA) [Rawal, Schött, Dahlström, Inturrisi, Tandon, Sjöstrand & Wennhager], 194
- in studies of pharmacology and pathology of 4-anilinopiperidine analogues and morphine in rat and cat (OA) [Yaksh, Noueihed & Durant], 54

# neuromuscular relaxants

## edrophonium

- in antagonism of varying intensity neuromuscular blockade induced by atracurium, pancuronium, or vecuronium (OA) [Rupp, McChristian, Miller, Taboada & Cronnelly], 711

## neostigmine

- in antagonism of varying intensity neuromuscular blockade induced by atracurium, pancuronium, or vecuronium (OA) [Rupp, McChristian, Miller, Taboada & Cronnelly], 711

## physostigmine

- antagonism of flunitrazepam (OA) [Vatashsky, Beilin, Razin & Weinstock], 248

# Antiarrhythmia, See under Heart

# Aortic surgery, See under Surgery

**Arrhythmias, See under Heart**  
**Arterial venous pressure, See under Monitoring**  
**Arteries, See also under Blood pressure**  
   cannulation  
     tidy adjunct to (CO) [Sabo & Smith], 534  
   fistula  
     unexpected, in arm of intravenous drug abuser (CO) [Greene], 842  
   pulmonary, pressure in  
**Arthritis, See under Complications**  
**Aspiration, See under Complications; Lung(s)**  
**Aspirin, See under Analgesics, nonnarcotic; Blood**  
**Asystole, See under Complications**  
**Atracurium, See under Neuromuscular relaxants**  
**Atria, See under Heart**  
**Atrial pacing, See under Heart**  
**Atropine, See under Parasympathetic nervous system**  
**Autonomic neuropathy, See under Complications**  
**Autoradiography, See under Measurement techniques**

## B

**Baclofen, See under Acid analogues; Muscle**  
**Baroreceptor reflexes, See under Blood pressure; Reflexes**  
**Baroreflex, See under Reflexes**  
**Benzocaine, See under Anesthetics, local**  
**Benzodiazepinase, See under Receptors**  
**Beta-adrenergic blocker, See under Sympathetic nervous system**  
**Biotransformation**  
   of halothane and enflurane in patients with hyperthyroidism (CR) [Servin, Nivoche, Desmonts, Rice & Mazze], 387  
**Bleeding time, See under Blood**  
**Bleomycin, See under Toxicity**  
**Blood**  
   aspirin  
     usefulness of post-aspirin bleeding time in use of (CR) [Hindman & Koka], 368  
   bleeding time  
     post-aspirin, usefulness of (CR) [Hindman & Koka], 368  
   coagulation  
     in heparin resistance prior to cardiopulmonary bypass (CR) [Anderson], 504  
     usefulness of post-aspirin bleeding time in assessment of (CR) [Hindman & Koka], 368  
   hemoglobin dissociation  
     isoflurane and, in humans (CO) [Lanza & Mercadante], 413  
   heparin  
     resistance prior to cardiopulmonary bypass (CR) [Anderson], 504  
   methemoglobinemia  
     benzocaine-induced, in Sprague-Dawley rats (CO) [Englebach & Harp], 132  
   neutrophils  
     inhibition by volatile anesthetics (EV) [Welch], 1  
     superoxide production and  $\text{Ca}^{2+}$  mobilization in, inhibition by halothane, enflurane, and isoflurane (OA) [Nakagawara, Takeshige, Takamatsu, Takahashi, Yoshitake & Minakami], 4  
   reaction  
     and fulminating noncardiogenic pulmonary edema following cardiopulmonary bypass (CR) [Latson, Kickler & Baumgartner], 106  
**Blood flow, See under Brain; Lung(s); Uterus**  
**Blood patch, See under Anesthetic techniques**

**Blood pressure, See also under Monitoring**  
   baroreceptor reflexes  
     influence of venous return on, during lumbar epidural anesthesia (OA) [Baron, Decaux-Jacolot, Edouard, Berdeaux & Samii], 188  
   drug effects  
     of alfentanil in unanesthetized dogs (OA) [Arndt, Bednarski & Parasher], 345  
     of esmolol after ketamine induction and intubation (OA) [Gold, Brown, Coverman & Herrington], 718  
     with halothane in coronary stenosis mediated by changes in hemodynamics (OA) [Buffington], 632  
   hypotension  
     influence of venous return on, during lumbar epidural anesthesia (OA) [Baron, Decaux-Jacolot, Edouard, Berdeaux & Samii], 188  
   hypotension, induced  
     cerebral oxygen tension in rats during (OA) [Seyde & Longenecker], 480  
   left ventricular end-diastolic  
     analysis of, in study of halothane and left ventricular compliance (OA) [Greene & Gerson], 230  
   measurement  
     and tidy adjunct to arterial cannulation (CO) [Sabo & Smith], 534  
   pulmonary arterial wedge pressure  
     and left ventricular end-diastolic volume after coronary artery bypass graft surgery, poor correlation between (OA) [Hansen, Viquerat, Matthey, Wiener-Kronish, DeMarco, Bahtia, Marks, Botvinick & Chatterjee], 764  
   pulmonary artery  
     and left ventricular end-diastolic volume after coronary artery bypass graft surgery, poor correlation between (OA) [Hansen, Viquerat, Matthey, Wiener-Kronish, DeMarco, Bahtia, Marks, Botvinick & Chatterjee], 764  
   pulmonary capillary wedge  
     analysis of, in study of halothane and left ventricular compliance (OA) [Greene & Gerson], 230  
**Body temperature, See under Temperature**  
**Book reviews**  
   Carlson, C. C., and Howland, W. S. (eds.), *High-Frequency Ventilation in Intensive Care and During Surgery*, 848  
   Comroe, J., *Exploring the Heart: Discoveries in Heart Disease and High Blood Pressure*, 304  
   Crawford, J. S., *Obstetric Analgesia and Anaesthesia*, 304  
   Dorsch, J. S., and Dorsch, S. E., *Understanding Anesthesia Equipment, second edition*, 135  
   Frost, E. A. M., *Clinical Anesthesia in Neurosurgery*, 416  
   Kramer, M., *Invasive Procedures. A Year in the World of Two Surgeons*, 135  
   Mannheimer, J. S., and Lampe, G. N., *Clinical Transcutaneous Electrical Nerve Stimulation*, 671  
   Pichlmayr, I., Lips, U., and Kunkel, H., *The Electroencephalogram in Anesthesia*, 304  
   Prys-Roberts, C., and Hug, C. C., Jr. (eds.), *Pharmacokinetics of Anesthesia*, 671  
   Silverman, W. A., *Human Experimentation: A Guided Step into the Unknown*, 848  
   Steward, D. J., *Manual of Pediatric Anesthesia*, 671  
   Zapol, W. M., and Falke, K. J., *Acute Respiratory Failure*, 136  
**Brachial plexus block, See under Anesthetic techniques, regional**  
**Bradycardia, See under Complications**  
**Brain**  
   amino acids  
     influence of nitrous oxide on (OA) [Viña, Davis & Hawkins], 490

- blood flow**  
and cerebral function, after complete cerebral ischemia in dog (OA) [Stangland, Milde & Michenfelder], 430  
effect of isoflurane-induced hypotension on (OA) [Newman, Gelb & Lam], 307  
effects of flunarizine on (OA) [Deshpande & Wieloch], 215  
following succinylcholine in dogs (OA) [Lanier, Milde & Michenfelder], 551
- regional**  
during lidocaine-induced seizures in rats (OA) [Tommasino, Maekawa & Shapiro], 771  
regional, isoflurane, halothane and, at various levels of  $P_{aCO_2}$  in rabbits (OA) [Scheller, Todd & Drummond], 598
- cerebral blood flow**  
response of, to changes in carbon dioxide tension during hypothermic cardiopulmonary bypass (OA) [Prough, Stump, Roy, Gravlee, Williams, Mills, Hinshelwood & Howard], 576
- CO<sub>2</sub> response**  
various levels of, isoflurane, halothane and regional cerebral blood flow at, in rabbits (OA) [Scheller, Todd & Drummond], 598
- convulsions**  
and effect of lidocaine on hippocampus *in vitro* (LR) [Schurr, Spears, Reid, West, Edmonds & Rigor], 501
- delayed neuronal necrosis**  
effect of isoflurane on, following near-complete forebrain ischemia in rat (OA) [Warner, Deshpande & Wieloch], 19
- development**  
after brief exposure to nitrous oxide or halothane (OA) [Rodier, Aschner, Lewis & Koeter], 673  
cell proliferation in, after brief exposure to nitrous oxide or halothane (OA) [Rodier, Aschner, Lewis & Koeter], 680
- electroencephalogram**  
in assessment of cerebral stimulation following succinylcholine in dogs (OA) [Lanier, Milde & Michenfelder], 551  
in study of power spectrum changes during induction with enflurane (OA) [Levy], 688
- electroencephalography**  
during lidocaine-induced seizures in rats (OA) [Tommasino, Maekawa & Shapiro], 771  
in study of physiology of alfentanil-induced rigidity (OA) [Ben-thuysen, Smith, Sanford, Head & Dec-Silver], 440
- forebrain ischemia**  
effect of isoflurane on neuronal necrosis following (OA) [Warner, Deshpande & Wieloch], 19
- function**  
in rats during etomidate anesthesia (OA) [Davis, Mans, Biebuyck & Hawkins], 751
- glucose metabolism**  
in rats during etomidate anesthesia (OA) [Davis, Mans, Biebuyck & Hawkins], 751
- hippocampus**  
effect of lidocaine on, *in vitro* (LR) [Schurr, Spears, Reid, West, Edmonds & Rigor], 501
- infarction**  
neurosurgery in, intraoperative glucose during (OA) [Sieber, Smith, Kupferberg, Crosby, Uzzell, Buzby, March & Nann], 453
- intracranial**  
following succinylcholine in dogs (OA) [Lanier, Milde & Michenfelder], 551
- intracranial pressure**  
isoflurane and (CO) [Finck], 833  
isoflurane and (CO) [Grosslight & Bedford], 834
- ischemia**  
complete, canine cerebral function and blood flow after (OA) [Stangland, Milde & Michenfelder], 430  
effects of flunarizine on (OA) [Deshpande & Wieloch], 215
- metabolism**  
effect of isoflurane-induced hypotension on (OA) [Newman, Gelb & Lam], 307  
following succinylcholine in dogs (OA) [Lanier, Milde & Michenfelder], 551
- mitosis**  
after brief exposure to nitrous oxide or halothane (OA) [Rodier, Aschner, Lewis & Koeter], 680  
in developing brain after brief exposure to nitrous oxide or halothane (OA) [Rodier, Aschner, Lewis & Koeter], 680
- neurogenesis**  
after brief exposure to nitrous oxide or halothane (OA) [Rodier, Aschner, Lewis & Koeter], 680  
in developing brain after brief exposure to nitrous oxide or halothane (OA) [Rodier, Aschner, Lewis & Koeter], 680
- oxygen consumption**  
following succinylcholine in dogs (OA) [Lanier, Milde & Michenfelder], 551
- oxygen tension**  
in rats during deliberate hypotension (OA) [Seyde & Longnecker], 480
- protection**  
by barbiturate during cardiopulmonary bypass (OA) [Nussmeier, Arlund & Slogoff], 165  
barbiturate-induced, in man, demonstration of (EV) [Michenfelder], 140
- respiratory depression**  
flunitrazepam-induced, effect of physostigmine on (OA) [Vatashsky, Beilin, Razin & Weinstock], 248
- seizures**  
lidocaine-induced, local cerebral blood flow during (OA) [Tommasino, Maekawa & Shapiro], 771
- stroke**  
after cardiopulmonary bypass, protection by barbiturate (OA) [Nussmeier, Arlund & Slogoff], 165
- unconsciousness**  
flunitrazepam-induced, effect of physostigmine on (OA) [Vatashsky, Beilin, Razin & Weinstock], 248
- Breathing pattern, See under Ventilation**  
**Bronchopleural fistula, See under Lung(s)**  
**Bronchoscopes, See under Equipment**  
**Bronchoscopy, See under Surgery**  
**Bronchus, See under Lung(s)**  
**Bupivacaine, See under Anesthetics, local**  
**Buprenorphine, See under Analgesics, narcotic**  
**Burns, See under Complications**
- C**
- Calcium, See under Heart, antiarrhythmia; Ions**  
**Calcium blockers, See under Ions**  
**Cannulation, See under Arteries; Veins**  
**Carbon dioxide, See also under Metabolism**  
**cerebral blood flow**  
response of, to changes in carbon dioxide tension during hypothermic cardiopulmonary bypass (OA) [Prough, Stump, Roy, Gravlee, Williams, Mills, Hinshelwood & Howard], 576



- hypercarbia**  
and cerebral blood flow during anesthesia in rabbits (OA) [Scheller, Todd & Drummond], 598  
in malignant hyperthermia susceptible swine (OA) [Gronert, Ahern, Milde & White], 24  
pulmonary vascular responses to, after cardiopulmonary bypass (OA) [Salmenperä & Heinonen], 311
- hypocarbica**  
and cerebral blood flow during anesthesia in rabbits (OA) [Scheller, Todd & Drummond], 598  
pulmonary vascular responses to, after cardiopulmonary bypass (OA) [Salmenperä & Heinonen], 311
- hypothermia**  
during hypothermic cardiopulmonary bypass, response of cerebral blood flow to (OA) [Prough, Stump, Roy, Gravlee, Williams, Mills, Hinshelwood & Howard], 576
- occlusion pressure response**  
in prolonged opioid antagonism with nalmefene (OA) [Gal & DiFazio], 175  
and variability of respiratory response to diazepam (OA) [Bailey, Andriano, Goldman, Stanley & Pace], 460
- production**  
and resting metabolic rate of critically ill patient: measured versus predicted (OA) [Weissman, Kemper, Askanazi, Hyman & Kinney], 673
- transcutaneous**  
for detection of air embolism in neurosurgical patients (OA) [Glenski & Cucchiara], 546  
for detection of venous air embolism (OA) [Glenski, Cucchiara & Michenfelder], 541
- ventilatory response**  
in prolonged opioid antagonism with nalmefene (OA) [Gal & DiFazio], 175  
and variability of respiratory response to diazepam (OA) [Bailey, Andriano, Goldman, Stanley & Pace], 460
- Carbon dioxide response, See under Ventilation**
- Carcinogenicity, See under Toxicity**
- Cardiac arrest, See under Heart**
- Cardiac compliance, See under Heart**
- Cardiac contractility, See under Heart**
- Cardiac massage, See under Heart**
- Cardiac output, See under Heart; Measurement techniques**
- Cardiac rhythm, See under Heart**
- Cardiac surgery, See under Surgery**
- Cardiovascular anesthesia, See under Anesthesia**
- Cardiovascular surgery, See under Surgery**
- Carlson, C. C., and Howland, W. S. (eds.)**  
*High-Frequency Ventilation in Intensive Care and During Surgery*, (BR), 848
- Carotid endarterectomy, See under Surgery**
- Catecholamines, See under Hormones; Sympathetic nervous system**
- Catheters, See under Equipment; Monitoring**
- Cerebral blood flow, See under Brain; Carbon dioxide; Hypothermia**
- Cerebrospinal fluid pressure**  
response, to endotracheal suctioning, effect of lidocaine on (CR) [Yano, Nishiyama, Yokota, Kato, Yamamoto & Otsuka], 651
- Cesarean section, See under Anesthesia, obstetric**
- Chloroprocain, See under Anesthetics, local**
- Cholinesterase, See under Enzymes**
- Cimetidine, See under Histamine; Pharmacology**
- Circuits, See under Equipment**
- Clonidine, See under Pharmacology; Premedication; Sympathetic nervous system**
- Coagulation, See under Blood**
- Cocaine, See under Anesthetics, local**
- CO<sub>2</sub> response, See under Brain**
- Compliance, See under Heart; Lung(s)**
- Complications**
- AIDS**  
anesthetic management of patients with (CO) [Arden], 660
- air embolism**  
venous, detection of, by airway pressure monitoring (CR) [Sloan & Kimovec], 645
- alarms**  
help or hindrance (CO) [Schmidt & Baysinger], 654
- arterial injection**  
arteriovenous fistula in arm of intravenous drug abuser (CO) [Greene], 842
- arthritis**  
as cause of difficult endotracheal intubation (CR) [Salzarulo & Taylor], 366
- aspiration**  
foreign body, during fiberoptic-assisted intubation (CO) [ ], 303  
after priming dose of vecuronium (CR) [Musich & Walts], 517  
and use of cricoid pressure, awake intubation, or both (CO) [Kempen], 831  
and use of cricoid pressure, awake intubation, or both (CO) [Salem, Joseph, Heyman & Paulsian], 832
- asystole**  
and bradycardia, following rapid administration of sufentanil with vecuronium (CR) [Starr, Sethna & Estafanous], 521
- autonomic neuropathy**  
in diabetic patient with renal failure (CR) [Ciccarelli, Ford & Tsueda], 283
- bradycardia**  
associated with baclofen during general anesthesia (CR) [Sill, Schumacher, Southorn, Reuter & Yaksh], 255
- burns**  
in use of "innovated" cylinder valve handle for cracking valve (CO) [Riddle], 659  
in use of "innovated" cylinder valve handle for cracking valve (CO) [Yamashita, Motokawa & Watanabe], 658
- convulsions**  
following stellate ganglion block after negative aspiration and test dose (CO) [Ellis & Ramamurthy], 533
- coughing**  
lidocaine for control of, during standby cataract surgery (CO) [Fenton], 847
- decubitus**  
simple, inexpensive method to prevent (CO) [Brighthouse], 536
- diabetes**  
as cause of difficult endotracheal intubation (CR) [Salzarulo & Taylor], 366
- diabetes insipidus**  
prolonged, subsequent to chemical meningitis (CR) [Garfield, Andriole, Vetto & Richie], 253
- edema**  
noncardiogenic pulmonary, following cardiopulmonary bypass (CR) [Latson, Kickler & Baumgartner], 106
- epiglottitis**  
acute  
anesthesia for (CO) [Williams], 663
- esophageal intubation**  
and end-tidal P<sub>CO<sub>2</sub></sub> should it be standard of care in obstetric anesthesia? (CO) [Choi, Tremper & Garber], 829
- facial nerve paralysis**  
after general anesthesia, in Heerfordt's syndrome (CR) [Vaghadia], 513

- gas leak**  
potential source of (CO) [Daniell], 298  
potential source of (CO) [Raja & Geller], 297
- genital herpes infections**  
anesthesia for cesarean section in patients with (CR) [Ramanathan, Sheth & Turndorf], 807
- head injury**  
management of, incidence of Horner syndrome with interscalene brachial plexus block and (CO) [Al-Khafaji & Elias], 127
- Heerfordt's syndrome**  
in facial paresis after general anesthesia (CR) [Vaghadia], 513
- hemimacroglossia**  
of tongue in long-duration neurosurgical procedure (CO) [Teeple, Maroon & Rueger], 845
- hoarseness**  
in guided orotracheal intubation in operating room using lighted stylet (CR) [Ellis, Jakymec, Kaplan, Stewart, Freeman, Ble-yaert & Berkebile], 823
- hypertension**  
in phenylephrine eyedrops and anesthesia (CR) [Van Der Spek & Hantler], 812  
and rectal clonidine in perioperative period (CR) [Johnston, Nicholas, Lawson, Wallfisch & Arens], 288
- hypotension**  
associated with baclofen during general anesthesia (CR) [Sill, Schumacher, Southorn, Reuter & Yaksh], 255  
with halothane in coronary stenosis mediated by changes in hemodynamics (OA) [Buffington], 632
- hypothermia**  
and simple method for warming intravenous fluid in infants (CO) [Rosen, Rosen & Broadman], 133
- hypoxia**  
following tricuspid valve resection (CR) [Fyman, Stein, Gotta, Casthely, Ergin & Griep], 113
- infection**  
of health-care workers with AIDS, anesthetic management for prevention of (CO) [Arden], 660
- intravascular injection**  
of epinephrine, monitoring maternal heart rate during (CO) [Chestnut & Wiener], 839
- intubation**  
as hazard for anesthesiologist, intubation technique causing (CO) [Hein & Freeman], 536
- ischemic necrosis**  
of tongue in long-duration neurosurgical procedure (CO) [Teeple, Maroon & Rueger], 845
- meningitis**  
chemical, prolonged diabetes insipidus subsequent to (CR) [Garfield, Andriole, Vetto & Richie], 253
- movement**  
unusual cause of, during anesthesia (CR) [Adragna], 89
- myasthenia gravis**  
vecuronium for muscle relaxation in patients with (CR) [Buzello, Noeldge, Krieg & Brobmann], 507
- myocardial ischemia**  
with halothane in coronary stenosis mediated by changes in hemodynamics (OA) [Buffington], 632
- pneumothorax**  
in esophageal perforation associated with endotracheal intubation (CR) [Johnson & Hood], 281
- preeclampsia**  
defense of trimethaphan for use in (CO) [Sosis & Leighton], 657
- pulmonary**  
occurring in recovery room after general anesthesia (CR) [Beard, Jick & Walker], 269
- pulmonary artery catheter**  
frozen: complication associated with cryoablation of ventricle (CO) [Zahl, Murray & Jobes], 662  
proximal port dysfunction, erroneous cardiac output determination due to (CO) [Curley, Harte & Sheikh], 662
- pulmonary artery perforation**  
during cardiac surgery (CR) [Johnston, Royster, Choplin, Howard, Mills & Tucker], 258
- pulmonary artery pressure erroneously high**  
in frozen pulmonary artery catheter (CO) [Zahl, Murray & Jobes], 662
- pulmonary edema**  
due to cutaneous bronchopleural fistula (CR) [Brister, Barnette & Reardon], 802
- rigidity**  
following sufentanil (CO) [Goldberg & McKenna], 667  
following sufentanil (CO) [Griffiths], 667  
following sufentanil (CO) [Hilberman & Hyer], 665
- sore throat**  
in guided orotracheal intubation in operating room using lighted stylet (CR) [Ellis, Jakymec, Kaplan, Stewart, Freeman, Ble-yaert & Berkebile], 823
- stroke**  
and barbiturate-induced brain protection in man (EV) [Michenfelder], 140
- subdural injection**  
during epidural catheterization—probably (CO) [Stevens], 839  
during epidural catheterization—probably not (CO) [Redick], 838  
during epidural catheterization—probably not (CO) [West], 838
- venous entrapment**  
in external jugular cannulation (CO) [Hey, Mahood & Pietak], 836
- Computers, See under Equipment; Monitoring**
- Comroe, J.**  
*Exploring the Heart: Discoveries in Heart Disease and High Blood Pressure* (BR), 304
- Conduction, See under Heart**
- Continuous infusion, See under Anesthetic techniques**
- Contractility, See under Heart**
- Convulsions, See under Brain; Complications**
- Coronary artery disease, See under Heart**
- Coronary blood flow, See under Heart**
- Coronary flow, See under Heart**
- Coronary stenosis, See under Heart**
- Costs, anesthesia, See under Anesthesia**
- Coughing, See under Complications**
- Crawford, J. S.**  
*Obstetric Analgesia and Anaesthesia* (BR), 304
- Creatinine, See under Kidney**
- Cricoid pressure, See under Larynx**
- Cyclophosphamide, See under Interactions**
- Cylinders, See under Equipment**

## D

- Dantrolene, See under Neuromuscular relaxants**
- Decubitus, See under Complications**
- Departmental libraries, See under Anesthesia; Education**
- Diabetes, See under Complications; Metabolism**
- Diabetes insipidus, See under Complications**
- Diaphragm, See under Muscle, skeletal**
- Diazepam, See under Anesthetics, intravenous**
- Dibucaine, See under Anesthetics, local**
- Digoxin, See under Pharmacology**

Dorsch, J. S., and Dorsch, S. E.,

*Understanding Anesthesia Equipment, second edition* (BR), 135

Dose-response, *See under* Pharmacology

Drapes, surgical, *See under* Equipment

Droperidol, *See under* Anesthetics, intravenous; Pharmacokinetics

Drug interactions, *See under* Pharmacology

Dysrhythmia, *See under* Heart

## E

Echocardiography, *See under* Equipment; Measurement techniques; Monitoring

Edema, *See under* Complications; Lung(s)

Edrophonium, *See under* Antagonists, neuromuscular relaxants

Education

animal rights and biomedical research (EV) [Shapiro], 142

libraries, departmental

dyscosmesis delays disappearance (CO) [Smith], 133

status of women in academic anesthesiology (SA) [Wilkinson & Linde], 496

Electrocardiography, *See under* Heart; Monitoring

Electroencephalogram, *See under* Brain

Electroencephalography, *See under* Brain

Electromyography, *See under* Muscle

Embolism

air

detection of, in neurosurgical patients, transcutaneous O<sub>2</sub> and CO<sub>2</sub> monitoring for (OA) [Glenski & Cucchiara], 546

paradoxical

hemodynamic effects of positive end-expiratory pressure during (OA) [Pearl & Larson], 724

pulmonary, in pediatric patients undergoing central catheter placement (CR) [Leicht & Waldman], 519

subclavian vein catheter as source of, in sitting position (CO) [Kloosterboer, Springman & Coursin], 411

venous, detection of, by airway pressure monitoring (CR) [Sloan & Kimovec], 645

venous, transesophageal echocardiography and transcutaneous O<sub>2</sub> and CO<sub>2</sub> monitoring for detection of (OA) [Glenski, Cucchiara & Michenfelder], 541

amniotic fluid

left heart failure in (CR) [Girard, Mal, Laine, Petitpretz, Rain & Duroux], 262

End tidal carbon dioxide, *See under* Monitoring

End-diastolic volume, *See under* Heart

End-expiratory pressure, *See under* Ventilation

Endobronchial intubation, *See under* Anesthetic techniques

Endobronchial technique, *See under* Anesthetic techniques

Endotracheal anesthesia, *See under* Anesthetic techniques

Endotracheal intubation, *See under* Intubation

Enflurane, *See under* Anesthetics, volatile

Enzymes

cholinesterase

inhibition of, in physostigmine antagonism of flunitrazepam (OA) [Vatashsky, Beilin, Razin & Weinstock], 248

methionine synthase

influence of nitrous oxide on (OA) [Viña, Davis & Hawkins], 490

methionine synthetase

influence of nitrous oxide on (OA) [Viña, Davis & Hawkins], 490

Epidural anesthesia, *See under* Anesthetic techniques, epidural

Epidural narcotics, *See under* Anesthetic techniques

Epiglottitis, *See under* Complications

Epinephrine, *See under* Sympathetic nervous system

## Equipment

alarms

anesthesia (CO) [Samuels], 128

help or hindrance (CO) [Schmidt & Baysinger], 654

that speak (CO) [Burke], 655

analyzers

and alarms, difficulties in distinguishing signals of (CO) [Schmidt & Baysinger], 654

anesthesia mask

"fruit-flavored," for children (CO) [Yamashita & Motokawa], 837

bronchoscope

fiberoptic

improved technique for use of (CO) [Green], 835

catheter

Broviac®

air embolism following central venous insertion of, in pediatric patient (CR) [Leicht & Waldman], 519

flow-directed

in study of injectate volume and temperature on thermolulution cardiac output determination (LR) [Pearl, Rosenthal, Nielson, Ashton & Brown], 798

Hickman®

air embolism following central venous insertion of, in pediatric patient (CR) [Leicht & Waldman], 519

catheters

central venous

multiple-lumen, methylene blue aids replacement of (CO) [Wong & Lupei], 842

multiorificed

placement of, with intravascular electrocardiographic technique (CO) [Johans], 411

pulmonary artery

multiple-lumen, methylene blue aids replacement of (CO) [Wong & Lupei], 842

subclavian vein

as source of air emboli in sitting position (CO) [Kloosterboer, Springman & Coursin], 411

circuits

Magill

and eponyms used in anesthesiology (CO) [Mapleson], 829

Mapleson

and eponyms used in anesthesiology (CO) [Mapleson], 829

computers

computerized anesthesia records may be dangerous (CO) [Noel], 300

cylinders

"innovated," valve handle of, do not use for cracking valve (CO) [Riddle], 659

"innovated," valve handle of, do not use for cracking valve (CO) [Yamashita, Motokawa & Watanabe], 658

drapes, surgical

method to secure on IV poles (CO) [Kataria & Chen], 302

echocardiography

in blunt chest injury: correlation with perioperative hypotension (CR) [Eisenach, Nugent, Miller & Mucha], 364

face-rest

head and chin cushioned, for surgery in prone position (CO) [Ray], 301

fiberoptic bronchoscope

for acute epiglottitis (CO) [Williams], 663

for difficult pediatric intubation (CO) [Berthelsen & Jacobsen], 668

for difficult pediatric intubation (CO) [Laravuso & Perloff], 668

- fiberoptic bronchoscopes**  
in simple technique for difficult endotracheal reintubations (CR) [Hudes, Fisher & Guslitz], 515
- humidifier(s)**  
as source of major gas leak (CO) [Daniell], 298  
as source of major gas leak (CO) [Raja & Geller], 297
- disposable**  
passive heat and moisture exchangers, do they keep the patient warm? (CR) [Haslam & Nielsen], 379
- machines**  
Ohio® Modulus™, intraoperative air entrainment with (CR) [Lanier], 266
- mass spectrometer**  
better designs for, for use in awake patient (CO) [Norman, Zeig & Ahmad], 664
- monitoring**  
minimal requirements for—1986 (CO) [Modell], 840
- monitors**  
computerized anesthesia records may be dangerous (CO) [Noel], 300
- nasal airway**  
for mass spectrometer monitoring of awake patient (CO) [Norman, Zeig & Ahmad], 664
- nebulizers**  
for delivery of bronchodilators into anesthesia circuit (CO) [Diamond], 531
- oximeter**  
anesthesia and, for pediatric radiation therapy (CO) [Davies], 406
- pulmonary artery catheter**  
migration of, during cardiac surgery (CR) [Johnston, Royster, Choplin, Howard, Mills & Tucker], 258  
proximal port dysfunction, erroneous cardiac output determination due to (CO) [Curley, Harte & Sheikh], 662
- pulse oximeter**  
in assessment of collateral arterial flow (CO) [Nowak, Moorthy & McNiece], 527
- real-time ultrasonic guidance**  
for percutaneous puncture of internal jugular vein (CO) [Yonei, Nonoue & Sari], 830
- rhinoscope**  
**fiberoptic**  
in adult intubation (CO) [Eriksen], 128
- scavengers**  
Ohio® Modulus™, intraoperative air entrainment with (CR) [Lanier], 266
- tubes**  
**double-lumen**  
disposable, airway rupture with (CO) [Brodsky, Shulman & Mark], 415  
**nasogastric**  
and use of cricoid pressure, awake intubation, or both (CO) [Kempen], 831  
and use of cricoid pressure, awake intubation, or both (CO) [Salem, Joseph, Heyman & Paulissian], 832
- vaporizers**  
for delivery of bronchodilators into anesthesia circuit (CO) [Diamond], 531
- ventilator**  
conventional, use of in presence of bronchopleural fistula (CO) [Baxter], 835
- ventilators**  
Ohio® Modulus™, intraoperative air entrainment with (CR) [Lanier], 266
- Esmolol, See under Pharmacology; Sympathetic nervous system**
- Esophageal monitoring problems, See under Complications**
- Esters, See under Anesthetics, local**
- Ether, See under Anesthetics, volatile**
- Etomidate, See under Anesthetics, intravenous**
- Experimental pain, See under Pain**
- Eye(s), See also under Surgery**  
**intraocular pressure**  
lidocaine for control of, during standby cataract surgery (CO) [Fenton], 847  
and succinylcholine and open eye injury (CO) [Donlon], 525  
and succinylcholine and open eye injury (CO) [Jantzen, Hackett & Earnshaw], 524  
and succinylcholine and open eye injury (CO) [Libonati, Leahy & Ellison], 525
- F**
- Face-rest, See under Equipment**
- Facial nerve paralysis, See under Complications**
- Fasting, See under Metabolism**
- Fatty acids, See under Metabolism**
- Fentanyl, See under Analgesics, narcotic; Anesthetics, intravenous; Pharmacokinetics**
- Fetal heart rate, See under Monitoring**
- Fiberoptic bronchoscopes, See under Equipment**
- Fiberoptic intubation, See under Intubation**
- Fibrosis, See under Lung(s)**
- Fistula, See under Arteries; Veins**
- Flow-directed catheter, See under Equipment**
- Flunarizine, See under Pharmacology**
- Flunitrazepam, See under Anesthetics, intravenous**
- Forebrain, See under Brain**
- Free radicals, See under Toxicity**
- Frequency, See under Ventilation**
- Frost, E. A. M.**  
*Clinical Anesthesia in Neurosurgery* (BR), 416
- Furosemide, See under Pharmacology**
- G**
- Gallamine, See under Neuromuscular relaxants**
- Gas exchange, See under Ventilation**
- Gas leak, See under Complications**
- Gases**  
**nonanesthetic**  
**nitrogen**  
expiratory, and intraoperative air entrainment with Ohio® Modulus™ anesthesia machine (CR) [Lanier], 266
- Genital herpes infections, See under Complications**
- Glucose, See under Metabolism**
- Glucose metabolism, See under Brain**
- H**
- Halothane, See under Anesthetics, volatile**
- Head injury, See under Complications**
- Heart**  
**action potential**  
differential depression of, by halothane and isoflurane in vitro (OA) [Lynch], 620  
**afterload**  
as result of positive end-expiratory pressure (CO) [Berry], 130  
as result of positive end-expiratory pressure (CO) [Venus, Mathru & Smith], 131

- antiarrhythmia**  
   **calcium**  
     in isorhythmic dissociation (CO) [Gottlieb, Satariano, Sethna & Millar], 407
- arrhythmia(s)**  
   in conscious-state comparisons of effects of inhalation anesthetics in dogs (OA) [Atlee, Brownlee & Burstrom], 703  
   intraoperative, chronic hypokalemia and (CO) [Glaser], 408  
   intraoperative, chronic hypokalemia and (CO) [Vitez & Soper], 409
- treatment**  
   in isorhythmic dissociation (CO) [Gottlieb, Satariano, Sethna & Millar], 407
- atria**  
   isometric contraction of, increased sensitivity of, to halothane, isoflurane, and enflurane (OA) [Rao, Boyer, Krishna & Paradise], 13
- atrial pacing**  
   myocardial ischemia induced by, isoflurane improves tolerance to (OA) [Tarnow, Marksches-Hornung & Schulte-Sasse], 147
- beta adrenergic receptor**  
   and tolerance to potassium (CO) [Torretti, Gerson, Oats & Lange], 846
- blood flow**  
   in calcium blocking drugs and anesthetics in chronically instrumented dogs (OA) [Chelly, Rogers, Hysing, Taylor, Hartley & Merin], 560  
   in calcium blocking drugs and anesthetics in chronically instrumented dogs (OA) [Rogers, Hysing, Merin, Taylor, Hartley & Chelly], 568  
   and impaired systolic thickening associated with halothane, mediated by changes in hemodynamics (OA) [Buffington], 632  
   and intravenous nitroglycerin to prevent intraoperative myocardial ischemia (CO) [Coriat], 409
- cardiac arrest**  
   canine cerebral function and blood flow after (OA) [Stangland, Milde & Michenfelder], 430
- cardiac output**  
   effect of injectate volume and temperature on thermodilution (LR) [Pearl, Rosenthal, Nielson, Ashton & Brown], 798  
   effect of isoflurane and arterial oxygenation on, during one-lung ventilation (EV) [Benumof], 419  
   and hypoxic pulmonary vasoconstriction in dogs, influence of isoflurane on (OA) [Domino, Borowec, Alexander, Williams, Chen, Marshall & Marshall], 423  
   in positive end-expiratory pressure during continuous venous air embolism in dog (OA) [Pearl & Larson], 724
- compliance**  
   left ventricular, halothane does not alter (OA) [Greene & Gerson], 230  
   and pulmonary arterial wedge pressure, poor correlation between, after coronary artery bypass graft surgery (OA) [Hansen, Viquerat, Matthay, Wiener-Kronish, DeMarco, Bahtia, Marks, Botvinick & Chatterjee], 764
- conduction**  
   in conscious-state comparisons of effects of inhalation anesthetics in dogs (OA) [Atlee, Brownlee & Burstrom], 703
- contractility**  
   differential depression of, by halothane and isoflurane in vitro (OA) [Lynch], 620  
   effects of lidocaine on, in conscious dogs (OA) [Edouard, Berdeaux, Langlois, Samii, Giudicelli & Noviant], 316  
   increased sensitivity to halothane, isoflurane, and enflurane, in neonate (OA) [Rao, Boyer, Krishna & Paradise], 13
- coronary artery disease**  
   effects of midazolam on coronary circulation in (OA) [Marty, Nitenberg, Blanchet, Zouieueche & Desmonts], 206  
   ischemia in, is anesthesia beneficial for? (EV) [Merin, Lowenstein & Gelman], 137  
   isoflurane improves tolerance to atrial pacing in (OA) [Tarnow, Marksches-Hornung & Schulte-Sasse], 147
- coronary blood flow**  
   combined effects of verapamil and isoflurane on, in dog (OA) [Campos & Kapur], 778  
   effects of midazolam on, in coronary artery disease (OA) [Marty, Nitenberg, Blanchet, Zouieueche & Desmonts], 206
- coronary flow**  
   evaluation of, during anesthetic induction using thallium-201 perfusion scans (OA) [Kleinman, Henkin, Glisson, El-Etr, Bakhos, Sullivan, Montoya & Pifarre], 157
- coronary stenosis**  
   and impaired systolic thickening associated with halothane, mediated by changes in hemodynamics (OA) [Buffington], 632
- dysrhythmia**  
   during coronary artery bypass surgery (CR) [Weiskopf & Stead], 392
- electrocardiography**  
   in assessment of pancuronium and myocardial ischemia (CO) [Levy], 659  
   in assessment of pancuronium and myocardial ischemia (CO) [Thomson & Putnins], 660  
   in conscious-state comparisons of effects of inhalation anesthetics in dogs (OA) [Atlee, Brownlee & Burstrom], 703
- end-diastolic volume**  
   and pulmonary arterial wedge pressure, poor correlation between, after coronary artery bypass graft surgery (OA) [Hansen, Viquerat, Matthay, Wiener-Kronish, DeMarco, Bahtia, Marks, Botvinick & Chatterjee], 764
- failure**  
   left, in amniotic fluid embolism (CR) [Girard, Mal, Laine, Petitpretz, Rain & Duroux], 262
- ischemia**  
   evaluation of, during anesthetic induction using thallium-201 perfusion scans (OA) [Kleinman, Henkin, Glisson, El-Etr, Bakhos, Sullivan, Montoya & Pifarre], 157  
   is anesthesia beneficial for? (EV) [Merin, Lowenstein & Gelman], 137  
   isoflurane improves tolerance to atrial pacing in (OA) [Tarnow, Marksches-Hornung & Schulte-Sasse], 147
- massage**  
   closed-chest, transesophageal echocardiographic observations in patient undergoing (CR) [Clements, de Bruijn & Kisslo], 826
- myocardial contusion**  
   echocardiographic evaluation of patients with (CR) [Eisenach, Nugent, Miller & Mucha], 364
- myocardial function**  
   effects of isoflurane and halothane on, in children (OA) [Wolf, Neal & Peterson], 328  
   and impaired systolic thickening associated with halothane, mediated by changes in hemodynamics (OA) [Buffington], 632
- myocardial ischemia**  
   effect of prophylactic nitroglycerin on, during coronary artery bypass surgery (OA) [Gallagher, Moore, Jose, Botros & Clark], 785  
   and impaired systolic thickening associated with halothane, mediated by changes in hemodynamics (OA) [Buffington], 632  
   intraoperative, intravenous nitroglycerin to prevent (CO) [Coriat], 409

# **myocardial metabolism**

- combined effects of verapamil and isoflurane on, in dog (OA) [Campos & Kapur], 778
- effects of midazolam on, in coronary artery disease (OA) [Marty, Nitenberg, Blanchet, Zouioueche & Desmonts], 206

# **neonatal**

- isometric contraction of, increased sensitivity of, to halothane, isoflurane, and enflurane (OA) [Rao, Boyer, Krishna & Paradise], 13

# **nitroglycerin**

- prophylactic, during coronary artery bypass surgery (OA) [Gallagher, Moore, Jose, Botros & Clark], 785

no myocardial involvement in nonrigid malignant hyperthermia (CR) [Kawamoto, Yuge, Kikuchi, Kodama & Morio], 93

# **papillary muscle**

- differential depression of, by halothane and isoflurane in vitro (OA) [Lynch], 620

# **perfusion scans**

- evaluation of coronary flow during anesthetic induction using (OA) [Kleinman, Henkin, Glisson, El-Etr, Bakhos, Sullivan, Montoya & Pifarre], 157

# **polymorphous ventricular tachycardia**

- during coronary artery bypass surgery (CR) [Weiskopf & Stead], 392

# **potassium**

- tolerance to,  $\beta$ -adrenoceptor blockade and (CO) [Torretti, Gerson, Oats & Lange], 846

# **preload**

- assessment of, in study of halothane and left ventricular compliance (OA) [Greene & Gerson], 230
- and pulmonary arterial wedge pressure, poor correlation between, after coronary artery bypass graft surgery (OA) [Hansen, Viquerat, Matthay, Wiener-Kronish, DeMarco, Bahtia, Marks, Botvinick & Chatterjee], 764
- as result of positive end-expiratory pressure (CO) [Berry], 130
- as result of positive end-expiratory pressure (CO) [Venus, Mathru & Smith], 131

# **propranolol**

- and tolerance to potassium (CO) [Torretti, Gerson, Oats & Lange], 846

# **pulse rate**

- and impaired systolic thickening associated with halothane, mediated by changes in hemodynamics (OA) [Buffington], 632

# **rate**

- as effect of esmolol after ketamine induction and intubation (OA) [Gold, Brown, Coverman & Herrington], 718
- effects of lidocaine on, in conscious dogs (OA) [Edouard, Berdeaux, Langlois, Samii, Giudicelli & Noviant], 316
- in relation to alfentanil concentration in unanesthetized dogs (OA) [Arndt, Bednarski & Parasher], 345

# **rate response**

- differential depression of, by halothane and isoflurane in vitro (OA) [Lynch], 620

# **rhythm**

- in calcium blocking drugs and anesthetics in chronically instrumented dogs (OA) [Chelly, Rogers, Hysing, Taylor, Hartley & Merin], 560
- in calcium blocking drugs and anesthetics in chronically instrumented dogs (OA) [Rogers, Hysing, Merin, Taylor, Hartley & Chelly], 568

# **tamponade**

- intraoperative tension pneumopericardium with, after ligation of patent ductus arteriosus in premature neonate (CR) [Hickey], 641

# **thermodilution determination**

- effect of injectate volume and temperature on (LR) [Pearl, Rosenthal, Nielson, Ashton & Brown], 798

# **tricuspid regurgitation**

- hypoxia following (CR) [Fyman, Stein, Gotta, Casthely, Ergin & Griep], 113

# **T-wave abnormalities**

- following anesthesia and surgery (CR) [Breslow, Miller, Parker, Walman & Rogers], 398

# **vascular pressures**

- in positive end-expiratory pressure during continuous venous air embolism in dog (OA) [Pearl & Larson], 724

# **ventricular function**

- in calcium blocking drugs and anesthetics in chronically instrumented dogs (OA) [Chelly, Rogers, Hysing, Taylor, Hartley & Merin], 560
- in calcium blocking drugs and anesthetics in chronically instrumented dogs (OA) [Rogers, Hysing, Merin, Taylor, Hartley & Chelly], 568

# **volume**

- assessment of, in study of halothane and left ventricular compliance (OA) [Greene & Gerson], 230

# **Heating, *See under* Temperature**

# **Heerfordt's syndrome, *See under* Complications**

# **Hemimacroglossia, *See under* Complications**

# **Hemodynamics**

- changes in, coronary stenosis mediated by, impaired systolic thickening associated with halothane and (OA) [Buffington], 632

# **PEEP**

- effects of (CO) [Berry], 130
- effects of (CO) [Venus, Mathru & Smith], 131

# **Hemoglobin dissociation, *See under* Blood**

# **Heparin, *See under* Blood**

# **Hepatotoxicity, *See under* Liver**

# **High frequency oscillatory ventilation, *See under* Ventilation**

# **High-frequency ventilation, *See under* Ventilation**

# **Hippocampus, *See under* Brain**

# **Histamine**

## **airway response**

- prolonged hyporesponsiveness of, following general anesthesia (OA) [Amyot, Michoud, St-Jean, Chapleau & Couture], 758

## **cimetidine**

- intravenous, hemodynamic effects of, in intensive care unit patients (CR) [Iberty, Paluch, Helmer, Murgolo & Benjamin], 87

# **History**

## **anesthesia systems**

- eponyms used for (CO) [Mapleson], 829

# **History of anesthesia, *See under* Anesthesia**

# **Hoarseness, *See under* Complications**

# **Hormones**

## **catecholamines**

- study of, in investigation of epidural anesthesia and venous return (OA) [Baron, Decaux-Jacot, Edouard, Berdeaux & Samii], 188

## **hyperthyroidism**

- biotransformation of halothane and enflurane in patients with (CR) [Servin, Nivoche, Desmonts, Rice & Mazze], 387

## **renin-angiotensin**

- study of, in investigation of epidural anesthesia and venous return (OA) [Baron, Decaux-Jacot, Edouard, Berdeaux & Samii], 188

- thyroid**  
and postoperative hepatic dysfunction after halothane or enflurane anesthesia in patients with hyperthyroidism (CR) [Seino, Dohi, Aiyoshi, Mizutani, Nakamura & Naito], 122
- vasopressin**  
study of, in investigation of epidural anesthesia and venous return (OA) [Baron, Decaux-Jacolot, Edouard, Berdeaux & Samii], 188
- Horner syndrome, See under Sympathetic nervous system**
- Humidifier, See under Equipment**
- Humidifiers, See under Equipment**
- Hydralazine, See under Pharmacology**
- Hypercarbia, See under Carbon dioxide**
- Hyperglycemia, See under Metabolism**
- Hyperpyrexia, See under Hyperthermia**
- Hypertension, See under Complications**
- Hyperthermia**  
**hyperpyrexia**  
intraoperative (CO) [Crider, Nightengale & Hill], 413
- malignant**  
associated with masseter spasm, high incidence of, improper diagnostic test and (CO) [Ellis & Halsall], 291  
ester or amide local anesthetics in (CO) [Moore], 294  
and masseter spasm are not the same thing (CO) [Schwartz, Rockoff & Koka], 292  
and masseter spasm are not the same thing (CO) [Van Der Spek, Spargo & Nahrwold], 291  
no abnormal low molecular weight proteins identified in (LR) [Whistler, Isaacs & Badenhorst], 795  
nonrigid, no myocardial involvement in (CR) [Kawamoto, Yuge, Kikuchi, Kodama & Morio], 93  
susceptibility, muscle proteins in diagnosis of (OA) [Walsh, Brownell, Littmann & Paasuke], 473  
swine susceptible to, effect of CO<sub>2</sub>, calcium, digoxin, and potassium on (OA) [Gronert, Ahern, Milde & White], 24  
unexpected, manifesting during outpatient anesthesia (CR) [Braude, Press, Moyes, Isaacs, Danilewitz & Kolb], 647
- Hyperthyroidism, See under Hormones**
- Hypocarbica, See under Carbon dioxide**
- Hypokalemia, See under Ions, potassium**
- Hypotension, See under Anesthetic techniques; Blood pressure; Complications; Position**
- Hypothermia, See also under Carbon dioxide; Complications**  
**blood gases**  
in response to changes in carbon dioxide tension during hypothermic cardiopulmonary bypass (OA) [Prough, Stump, Roy, Gravlee, Williams, Mills, Hinshelwood & Howard], 576  
cardiopulmonary bypass, influence on neuromuscular transmission in absence of muscle relaxants (CR) [Buzello, Pollmaecher, Schluermann & Urbanyi], 279
- cerebral blood flow**  
response of, to changes in carbon dioxide tension during hypothermic cardiopulmonary bypass (OA) [Prough, Stump, Roy, Gravlee, Williams, Mills, Hinshelwood & Howard], 576
- Hypoxia, See also under Complications**  
and artificial ventilation of canine model of bronchopleural fistula (OA) [Mayers, Long, Breen & Wood], 739  
and intraoperative air entrainment with Ohio® Modulus® anesthesia machine (CR) [Lanier], 266
- pulmonary vascular response**  
effect of isoflurane and arterial oxygenation on, during one-lung ventilation (EV) [Benumof], 419  
and hypoxic pulmonary vasoconstriction in dogs, influence of isoflurane on (OA) [Domino, Borowec, Alexander, Williams, Chen, Marshall & Marshall], 423
- shunt**  
experimental, cardiac output effects of nitroglycerin in (CO) [Pearl & Rosenthal], 129
- Hypoxic pulmonary vasoconstriction, See under Lung(s)**
- I**
- Immune response**  
following cardiopulmonary bypass associated with antigranulocyte antibody (CR) [Latson, Kickler & Baumgartner], 106
- Induced hypotension, See under Anesthetic techniques; Blood pressure**
- Induction**  
**anesthesia**  
with ketamine, heart rate and blood pressure effects of esmolol after (OA) [Gold, Brown, Coverman & Herrington], 718
- Infarction, See under Brain**
- Infection, See also under Complications**
- AIDS**  
anesthetic management of patients with (CO) [Arden], 660  
as hazard for anesthesiologist, intubation technique causing (CO) [Hein & Freeman], 536
- neutrophils**  
inhibition by volatile anesthetics (EV) [Welch], 1  
superoxide production and Ca<sup>2+</sup> mobilization in, inhibition by halothane, enflurane, and isoflurane (OA) [Nakagawara, Takeshige, Takamatsu, Takahashi, Yoshitake & Minakami], 4
- Infiltration techniques, See under Anesthetic techniques**
- Insufflation, See under Anesthetic techniques**
- Intensive care**  
midazolam infusion for sedation in (CR) [Shapiro, Westphal, White, Sladen & Rosenthal], 394
- Interactions**  
**cyclophosphamide**  
and halothane, failure to detect toxicity with (CR) [Lee, Erbguth & Stevens], 810
- Intercostal nerve block, See under Anesthetic techniques, regional**
- Intermittent positive pressure, See under Ventilation**
- Intracranial pressure, See under Brain; Monitoring**
- Intraocular pressure, See under Eye(s)**
- Intrathecal anesthesia, See under Anesthetic techniques**
- Intravenous anesthesia, See under Anesthetic techniques**
- Intubation, See also under Anesthetic techniques**  
**complications**  
as hazard for anesthesiologist, intubation technique causing (CO) [Hein & Freeman], 536  
in guided orotracheal intubation in operating room using lighted stylet (CR) [Ellis, Jakymec, Kaplan, Stewart, Freeman, Bleyaert & Berkebile], 823  
difficult, solving of (CO) [Carlson & Perkins], 537
- endotracheal**  
atracurium or vecuronium for rapid sequence mode (CR) [Lennon, Olson & Gronert], 510
- complications**  
esophageal perforation as (CR) [Johnson & Hood], 281  
and improved technique for fiberoptic intubation (CO) [Green], 835
- difficult**  
diabetic "stiff joint syndrome" and (CR) [Salzarulo & Taylor], 366  
fiberoptic rhinoscope in (CO) [Eriksen], 128  
with ketamine, heart rate and blood pressure effects of esmolol after (OA) [Gold, Brown, Coverman & Herrington], 718

reintubations, difficult, simple technique for (CR) [Hudes, Fisher & Guslitz], 515

**technique**

- blind (CO) [Shapiro & Unger], 297
- diabetic "stiff joint syndrome" and (CR) [Salzarulo & Taylor], 366
- improved, for fiberoptic intubation (CO) [Green], 835
- in infants with midline facial defects (CR) [Jobes & Nicolson], 643
- technique of laryngoscopy for difficult intubation (CO) [Gandhi & Durgos], 528

**fiberoptic-assisted**

- foreign body aspiration during (CO) [ ], 303

**nasal**

- fiberoptic rhinoscope in (CO) [Eriksen], 128

**technique**

- combined**
  - blind nasal, retrograde and fiberoptic-assisted, in difficult intubation (CO) [Carlson & Perkins], 537
- in guided orotracheal intubation in operating room using lighted stylet (CR) [Ellis, Jakymec, Kaplan, Stewart, Freeman, Ble-yaert & Berkebile], 823

**Ions**

**calcium blocker**

- in ischemic brain damage (OA) [Deshpande & Wieloch], 215
- and combined effects of verapamil and isoflurane on coronary blood flow and myocardial metabolism (OA) [Campos & Kapur], 778

**effect on cardiac and skeletal muscle metabolism in malignant hyperthermia susceptible swine (OA) [Gronert, Ahern, Milde & White], 24**

**influx, receptor-mediated, halothane inhibition of (OA) [Yashima, Wada & Izumi], 466**

**local anesthetics and, effects of, on rhodopsin (OA) [Mashimo, Abe & Yoshiya], 447**

**mobilization in human neutrophils, inhibition by halothane, enflurane, and isoflurane (OA) [Nakagawara, Takeshige, Takamatsu, Takahashi, Yoshitake & Minakami], 4**

**mobilization of neutrophil cidal activity, inhibition by volatile anesthetics (EV) [Welch], 1**

**and muscle proteins in diagnosis of malignant hyperthermia susceptibility (OA) [Walsh, Brownell, Littmann & Paasuke], 473**

**verapamil**

- and anesthetics in chronically instrumented dogs, cardiovascular effects of and interaction between (OA) [Chelly, Rogers, Hysing, Taylor, Hartley & Merin], 560
- and anesthetics in chronically instrumented dogs, cardiovascular effects of and interaction between (OA) [Rogers, Hysing, Merin, Taylor, Hartley & Chelly], 568

**potassium**

- effect on cardiac and skeletal muscle metabolism in malignant hyperthermia susceptible swine (OA) [Gronert, Ahern, Milde & White], 24

**hypokalemia**

- chronic, and intraoperative dysrhythmias (CO) [Glaser], 408
- chronic, and intraoperative dysrhythmias (CO) [Vitez & Soper], 409
- plasma, failure of succinylcholine to alter, in children with myelomeningocele (CR) [Dierdorf, McNiece, Rao, Wolfe & Means], 272
- tolerance to,  $\beta$ -adrenoceptor blockade and (CO) [Torretti, Gerson, Oats & Lange], 846

**Ischemia, See under Brain; Heart**

**Ischemic necrosis, See under Complications**

**Isoflurane, See under Anesthetics, volatile**

## J

**Jugular vein, See under Veins**

## K

**Ketamine, See under Anesthetics, intravenous**

**Ketamine isomers, See under Anesthetics, intravenous**

**Kidney**

### blood

- in calcium blocking drugs and anesthetics in chronically instrumented dogs (OA) [Chelly, Rogers, Hysing, Taylor, Hartley & Merin], 560
- in calcium blocking drugs and anesthetics in chronically instrumented dogs (OA) [Rogers, Hysing, Merin, Taylor, Hartley & Chelly], 568

### clearance

#### creatinine

- for early detection of posttraumatic renal dysfunction (OA) [Shin, Mackenzie & Helrich], 605

#### free water

- for early detection of posttraumatic renal dysfunction (OA) [Shin, Mackenzie & Helrich], 605

### failure

- posttraumatic, creatinine clearance for early detection of (OA) [Shin, Mackenzie & Helrich], 605

**Kramer, M.,**

*Invasive Procedures. A Year in the World of Two Surgeons* (BR), 135

## L

**Lactate, See under Metabolism**

**Larynx**

### cricoid pressure

- awake intubation, or both? (CO) [Kempen], 831
- awake intubation, or both? (CO) [Salem, Joseph, Heyman & Paulsian], 832
- local anesthetics administered topically: sterile or not? (CO) [Halevy], 535

**Laser, See under Surgery**

**Left atrial pressure, See under Monitoring**

**Left ventricular end-diastolic pressure, See under Blood pressure**

**Libraries, See under Anesthesia; Education**

**Lidocaine, See under Anesthetics, local; Toxicity**

**Lidocaine hydrocarbonate, See under Anesthetics, local**

**Lidocaine hydrochloride, See under Anesthetics, local**

**Lighted stylet, See under Anesthetic techniques**

**Liver**

### amino acids

- influence of nitrous oxide on (OA) [Viña, Davis & Hawkins], 490

### hepatotoxicity

- postoperative, after halothane or enflurane anesthesia in patients with hyperthyroidism (CR) [Seino, Dohi, Aiyoshi, Mizutani, Nakamura & Naito], 122

**Local anesthesia, See under Anesthetics**

**Lofentanil, See under Analgesics, narcotic**

**Lumbar anesthesia, See under Anesthetic techniques**

**Lung(s)**

### blood flow

- effect of isoflurane and arterial oxygenation on, during one-lung ventilation (EV) [Benumof], 419
- and hypoxic pulmonary vasoconstriction in dogs, influence of isoflurane on (OA) [Domino, Borowec, Alexander, Williams, Chen, Marshall & Marshall], 423
- in response to moderate changes in  $P_{aCO_2}$  after cardiopulmonary bypass (OA) [Salmenperä & Heinonen], 311



**bronchopleural fistula**

- cutaneous, sudden intraoperative deterioration in ventilation due to (CR) [Brister, Barnette & Reardon], 802
- use of conventional ventilator in presence of (CO) [Baxter], 835

**bronchus**

- angles in, in infants and children (CR) [Kubota, Toyoda, Nagata, Kubota, Sawada, Murakawa & Fujimori], 374

**compliance**

- in hyperoxia in rabbits, intravenous bleomycin does not alter (OA) [Matalon, Harper, Nickerson & Olszowka], 614
- and use of conventional ventilator in presence of bronchopleural fistula (CO) [Baxter], 835

**edema**

- and artificial ventilation of canine model of bronchopleural fistula (OA) [Mayers, Long, Breen & Wood], 739
- in left heart failure in amniotic fluid embolism (CR) [Girard, Mal, Laine, Petitpretz, Rain & Duroux], 262
- oleic acid-induced, vasodilators worsen gas exchange in dog in (OA) [Bishop & Cheney], 435

**fibrosis**

- in hyperoxia in rabbits, intravenous bleomycin does not alter (OA) [Matalon, Harper, Nickerson & Olszowka], 614

**hypoxic pulmonary vasoconstriction**

- effect of isoflurane and arterial oxygenation on, during one-lung ventilation (EV) [Benumof], 419
- and gas exchange in dog oleic-acid lung injury (OA) [Bishop & Cheney], 435
- influence of isoflurane on, in dogs (OA) [Domino, Borowec, Alexander, Williams, Chen, Marshall & Marshall], 423

**oxygen toxicity**

- effects of, in rabbits, intravenous bleomycin does not alter (OA) [Matalon, Harper, Nickerson & Olszowka], 614
- increased N-pentane excretion in humans as consequence of (OA) [Morita, Snider & Inada], 730

**pulmonary edema**

- furosemide may be detrimental in treatment of (CO) [Ebert, Grimes & Niemann], 299
- furosemide may be detrimental in treatment of (CO) [Lydon], 298

**shunt**

- experimental, cardiac output effects of nitroglycerin in (CO) [Pearl & Rosenthal], 129

**shunting**

- effect of isoflurane and arterial oxygenation on, during one-lung ventilation (EV) [Benumof], 419
- and hypoxic pulmonary vasoconstriction in dogs, influence of isoflurane on (OA) [Domino, Borowec, Alexander, Williams, Chen, Marshall & Marshall], 423
- in response to moderate changes in  $\text{PaCO}_2$  after cardiopulmonary bypass (OA) [Salmenperä & Heinonen], 311

**trachea**

- angles in, in infants and children (CR) [Kubota, Toyoda, Nagata, Kubota, Sawada, Murakawa & Fujimori], 374
- local anesthetics administered topically: sterile or not? (CO) [Halvey], 535

**vascular resistance**

- experimental, cardiac output effects of nitroglycerin in (CO) [Pearl & Rosenthal], 129
- in response to moderate changes in  $\text{PaCO}_2$  after cardiopulmonary bypass (OA) [Salmenperä & Heinonen], 311

**ventilation**

- end-tidal  $\text{CO}_2$  analyzers in proper positioning of double-lumen tubes (CO) [Shafieha, Sit, Kartha, Sabnis, Hajianpour, Pappas, Yu, Elam & Balagot], 844

**water**

- and gas exchange in dog oleic-acid lung injury (OA) [Bishop & Cheney], 435

**M****Machines, See under Equipment****Magnetometer, See under Magnetometer****Malignant hyperthermia, See under Hyperthermia****Mannheimer, J. S., and Lampe, G. N.**

- Clinical Transcutaneous Electrical Nerve Stimulation* (BR), 671

**Mask induction, See under Anesthesia, pediatric; Anesthetic techniques****Masks, anesthesia, See under Equipment****Mass spectrometer, See under Equipment; Monitoring****Masseter muscle, See under Muscle, skeletal****Measurement techniques****autoradiography**

- in measurement of regional brain glucose utilization in rats during etomidate anesthesia (OA) [Davis, Mans, Biebuyck & Hawkins], 751

**cardiac output**

- and effect of ventilation on baseline pulmonary artery temperature (CO) [Gravlee & Johnston], 293

**echocardiography**

- in assessment of hemodynamic and cardiovascular effects of isoflurane and halothane in children (OA) [Wolf, Neal & Peterson], 328

**electromyography**

- caution in making clinical recommendations based on (CO) [Kopman], 530
- caution in making clinical recommendations based on (CO) [Lee & Chen], 529
- in monitoring of neuromuscular function (CO) [Ali], 532
- in monitoring of neuromuscular function (CO) [Kopman], 532

**magnetometer**

- for assessment of load compensation during halothane anesthesia (OA) [Moote, Knill & Clement], 582

**neuromuscular blockade**

- electromyographic measurements and, caution in making clinical recommendations based on (CO) [Kopman], 530
- electromyographic measurements and, caution in making clinical recommendations based on (CO) [Lee & Chen], 529

**pulse oximetry**

- for assessment of collateral arterial flow (CO) [Nowak, Moorthy & McNiece], 527

**thermodilution**

- and effect of ventilation on baseline pulmonary artery temperature (CO) [Gravlee & Johnston], 293

**Mechanical ventilation, See under Ventilation****Membrane****model**

- in study of membrane fluidizing effect of anesthetics (OA) [Ueda, Hirakawa, Arakawa & Kamaya], 67

**Meningitis, See under Complications****Meperidine, See under Analgesics, intravenous****Metabolism, See also under Brain****carbon dioxide production**

- and resting metabolic rate of critically ill patient: measured versus predicted (OA) [Weissman, Kemper, Askanazi, Hyman & Kinney], 673

**diabetes**

- with renal failure, autonomic neuropathy in (CR) [Cicarelli, Ford & Tsueda], 283

- fasting**  
and intraoperative glucose during neurosurgery (OA) [Sieber, Smith, Kupferberg, Crosby, Uzzell, Buzby, March & Nann], 453
- fatty acids**  
and intraoperative glucose during neurosurgery (OA) [Sieber, Smith, Kupferberg, Crosby, Uzzell, Buzby, March & Nann], 453
- glucose**  
intraoperative, during neurosurgery (OA) [Sieber, Smith, Kupferberg, Crosby, Uzzell, Buzby, March & Nann], 453
- hyperglycemia**  
and intraoperative glucose during neurosurgery (OA) [Sieber, Smith, Kupferberg, Crosby, Uzzell, Buzby, March & Nann], 453
- lactate**  
and intraoperative glucose during neurosurgery (OA) [Sieber, Smith, Kupferberg, Crosby, Uzzell, Buzby, March & Nann], 453
- oxygen consumption**  
in relation to alfentanil concentration in unanesthetized dogs (OA) [Arndt, Bednarski & Parasher], 345  
and resting metabolic rate of critically ill patient: measured versus predicted (OA) [Weissman, Kemper, Askanazi, Hyman & Kinney], 673
- respiratory quotient**  
and resting metabolic rate of critically ill patient: measured versus predicted (OA) [Weissman, Kemper, Askanazi, Hyman & Kinney], 673
- Metacurine, See under Neuromuscular relaxants**
- Methadone, See under Analgesics; Pharmacodynamics**
- Methemoglobinemia, See under Blood**
- Methionine synthase, See under Enzymes**
- Methionine synthetase, See under Enzymes**
- Metocurine, See under Neuromuscular relaxants**
- Midazolam, See under Anesthetics, intravenous**
- Military, anesthesia in, See under Anesthesia**
- Minoxidil, See under Pharmacology**
- Mitosis, See under Brain**
- Monitoring**  
**airway pressure**  
detection of venous air embolism by (CR) [Sloan & Kimovec], 645
- alarms**  
anesthesia (CO) [Samuels], 128  
that speak (CO) [Burke], 655  
anesthesia and, for pediatric radiation therapy (CO) [Davies], 406
- arterial venous pressure**  
error in, due to pulmonary artery catheter proximal port dysfunction (CO) [Curley, Harte & Sheikh], 662
- blood pressure**  
and pulse oximetry for assessment of collateral arterial flow (CO) [Nowak, Moorthy & McNiece], 527  
and tidy adjunct to arterial cannulation (CO) [Sabo & Smith], 534
- blood pressures**  
for intraoperative radiation therapy (CR) [Bashein, Russell & Momii], 804
- carbon dioxide**  
for detection of air embolism in neurosurgical patients (OA) [Glenski & Cucchiara], 546  
end-tidal CO<sub>2</sub> analyzers in proper positioning of double-lumen tubes (CO) [Shafieha, Sit, Kartha, Sabnis, Hajianpour, Pappas, Yu, Elam & Balagot], 844  
transcutaneous, for detection of venous air embolism (OA) [Glenski, Cucchiara & Michenfelder], 541
- central venous pressure**  
in elective coronary bypass surgery (CO) [Liban & Davies], 664  
methylene blue aids multiple-lumen catheter replacement for (CO) [Wong & Lupei], 842
- echocardiography**  
**transesophageal**  
for detection of venous air embolism (OA) [Glenski, Cucchiara & Michenfelder], 541
- electrocardiography**  
with advanced portable electrocardioscope (CO) [Diehl & Loeser], 301  
intravascular, multiorificed catheter placement with (CO) [Johans], 411  
in study of isoflurane and tolerance to pacing-induced myocardial ischemia (OA) [Tarnow, Marksches-Hornung & Schulte-Sasse], 147
- electroencephalography**  
in study of power spectrum changes during induction with enflurane (OA) [Levy], 688
- electromyography**  
caution in making clinical recommendations based on (CO) [Kopman], 530  
caution in making clinical recommendations based on (CO) [Lee & Chen], 529  
in monitoring of neuromuscular function (CO) [Ali], 532  
in monitoring of neuromuscular function (CO) [Kopman], 532
- end tidal carbon dioxide**  
should it be standard of care in obstetric anesthesia? (CO) [Choi, Tremper & Garber], 829
- fetal heart rate**  
and maternal heart rate, during epidural epinephrine test dose (CO) [Chestnut & Wiener], 839
- intracranial pressure**  
isoflurane and (CO) [Finck], 833  
isoflurane and (CO) [Grosslight & Bedford], 834
- left atrial pressure**  
in positive end-expiratory pressure during continuous venous air embolism in dog (OA) [Pearl & Larson], 724
- mass spectrometer**  
better designs for, for use in awake patient (CO) [Norman, Zeig & Ahmad], 664
- minimal standards**  
in 1986 (CO) [Modell], 840
- monitors**  
computerized anesthesia records may be dangerous (CO) [Noel], 300
- in myocardial ischemia with halothane administration in coronary stenosis (OA) [Buffington], 632
- nerve stimulator**  
and electromyographic measurements, caution in making clinical recommendations based on (CO) [Kopman], 530  
and electromyographic measurements, caution in making clinical recommendations based on (CO) [Lee & Chen], 529
- oxygen**  
for detection of air embolism in neurosurgical patients (OA) [Glenski & Cucchiara], 546  
pulse oximetry for assessment of collateral arterial flow (CO) [Nowak, Moorthy & McNiece], 527  
transcutaneous, for detection of venous air embolism (OA) [Glenski, Cucchiara & Michenfelder], 541
- pulmonary artery catheter**  
in study of isoflurane and tolerance to pacing-induced myocardial ischemia (OA) [Tarnow, Marksches-Hornung & Schulte-Sasse], 147

- pulmonary artery pressure**
  - elective coronary bypass surgery without (CO) [Liban & Davies], 664
  - error in, due to pulmonary artery catheter proximal port dysfunction (CO) [Curley, Harte & Sheikh], 662
  - in frozen pulmonary artery catheter (CO) [Zahl, Murray & Jobes], 662
- real-time ultrasonic guidance**
  - for percutaneous puncture of internal jugular vein (CO) [Yonei, Nonoue & Sari], 830
- right atrial pressure**
  - in positive end-expiratory pressure during continuous venous air embolism in dog (OA) [Pearl & Larson], 724
- transconjunctival O<sub>2</sub>**
  - and cerebral blood flow during carotid artery occlusion (CR) [Gibson, McMichan & Cucchiara], 277
- transesophageal echocardiography**
  - in patient undergoing closed-chest massage (CR) [Clements, de Bruijn & Kisslo], 826
- ventilation**
  - for intraoperative radiation therapy (CR) [Bashein, Russell & ii], 804
- Monitoring equipment, *See under* Equipment**
- Monitors, *See under* Monitoring; Equipment**
- Morphine, *See under* Analgesics, narcotic; Anesthetics, intravenous; Pharmacodynamics**
- Movement of patient, *See under* Complications**
- Multiorificed catheter, *See under* Equipment**
- Muscle**
  - diseases**
    - malignant hyperthermia, muscle proteins in (OA) [Walsh, Brownell, Littmann & Paasuke], 473
  - electromyography**
    - in study of physiology of alfentanil-induced rigidity (OA) [Benthuisen, Smith, Sanford, Head & Dec-Silver], 440
  - neuromuscular function**
    - monitoring of (CO) [Ali], 532
    - monitoring of (CO) [Kopman], 532
  - rigidity**
    - alfentanil-induced, physiology of (OA) [Benthuisen, Smith, Sanford, Head & Dec-Silver], 440
  - skeletal**
    - diaphragm**
      - function of, effect of halothane on, in pentobarbital-anesthetized dogs (OA) [Clerque, Viires, Lemesle, Aubier, Viars & Pariente], 181
    - malignant hyperthermia, muscle proteins in (OA) [Walsh, Brownell, Littmann & Paasuke], 473
  - masseter**
    - malignant hyperthermia associated with, high incidence of, improper diagnostic test and (CO) [Ellis & Halsall], 291
    - spasm, and malignant hyperthermia are not the same thing (CO) [Schwartz, Rockoff & Koka], 292
    - spasm, and malignant hyperthermia are not the same thing (CO) [Van Der Spek, Spargo & Nahrwold], 291
  - myelomeningocele**
    - failure of succinylcholine to alter plasma potassium in children with (CR) [Dierdorf, McNiece, Rao, Wolfe & Means], 272
  - proteins**
    - low molecular weight, no abnormal, identified in human malignant hyperthermic muscle (LR) [Whistler, Isaacs & Badenhorst], 795

- smooth**
  - airway**
    - prolonged hyporesponsiveness of, to histamine following general anesthesia (OA) [Amyot, Michoud, St-Jean, Chapleau & Couture], 758
- Myasthenia gravis, *See under* Neuromuscular disease; Neuromuscular junction; Complications**
- Myelomeningocele, *See under* Muscle, skeletal**
- Myocardial contusion, *See under* Heart**
- Myocardial function, *See under* Heart**
- Myocardial ischemia, *See under* Complications; Heart**
- Myocardial metabolism, *See under* Heart**

## N

- Nalmefene, *See under* Antagonist, narcotic**
- Naloxone, *See under* Antagonists, narcotic**
- Narcotics, *See under* Analgesics, narcotic**
- Nasal airway, *See under* Equipment**
- Nasal intubation, *See under* Intubation**
- Nasal resistance, *See under* Ventilation**
- Nasogastric tubes, *See under* Equipment**
- Nebulizers, *See under* Equipment**
- Neonatal heart, *See under* Heart**
- Neostigmine, *See under* Antagonists, neuromuscular relaxants**
- Nerve stimulator, *See under* Monitoring; Neuromuscular transmission**
- Nerve(s)**
  - injury**
    - in neurotoxicity of local anesthetics (OA) [Myers, Kalichman, Reisner & Powell], 29
  - neuromuscular function**
    - monitoring of (CO) [Ali], 532
    - monitoring of (CO) [Kopman], 532
- Neurogenesis, *See under* Brain**
- Neurologic surgery, *See under* Surgery**
- Neurolytic sympathetic block, *See under* Anesthetic techniques**
- Neuromuscular blockade, *See under* Measurement techniques**
- Neuromuscular disease**
  - myasthenia gravis**
    - vecuronium for muscle relaxation in patients with (CR) [Buzello, Noeldge, Krieg & Brobmann], 507
- Neuromuscular function, *See under* Muscle; Nerve(s)**
- Neuromuscular junction**
  - diaphragmatic dysfunction at, halothane-induced (OA) [Clerque, Viires, Lemesle, Aubier, Viars & Pariente], 181
  - myasthenia gravis**
    - intravenous dantrolene in patient with (CR) [Mora, Eisenkraft & Papatestas], 371
- Neuromuscular relaxants**
  - alcuronium**
    - pharmacokinetics of, applied to calculation of bolus and infusion dosage regimens (MI) [Shanks], 72
  - atracurium**
    - continuous infusion of, in children (OA) [Goudsouzian, Martyn, Rudd, Liu & Lineberry], 171
    - level of paralysis recovery for antagonism of, with edrophonium (CR) [Hennart, d'Hollander, Plasman & De Jonckheere], 384
    - neostigmine and edrophonium antagonism of varying intensity neuromuscular blockade induced by (OA) [Rupp, McChristian, Miller, Taboada & Cronnelly], 711
    - pharmacokinetics of, applied to calculation of bolus and infusion dosage regimens (MI) [Shanks], 72

- for rapid sequence endotracheal intubation (CR) [Lennon, Olson & Gronert], 510  
single *versus* divided doses of (CR) [Weinberg, Stirt & Longnecker], 111
- dantrolene**  
intravenous, in patient with myasthenia gravis (CR) [Mora, Eisenkraft & Papatestas], 371  
for outpatient anesthesia, unexpected hyperthermia manifesting during (CR) [Braude, Press, Moyes, Isaacs, Danilewitz & Kolb], 647
- edrophonium**  
atracurium neuromuscular blockade with, level of paralysis recovery for antagonism of (CR) [Hennart, d'Hollander, Plasman & De Jonckheere], 384
- gallamine**  
pharmacokinetics of, applied to calculation of bolus and infusion dosage regimens (MI) [Shanks], 72
- metacurine**  
and myocardial ischemia (CO) [Levy], 659  
and myocardial ischemia (CO) [Thomson & Putnins], 660
- metocurine**  
pharmacokinetics of, applied to calculation of bolus and infusion dosage regimens (MI) [Shanks], 72
- pancuronium**  
and myocardial ischemia (CO) [Levy], 659  
and myocardial ischemia (CO) [Thomson & Putnins], 660  
neostigmine and edrophonium antagonism of varying intensity neuromuscular blockade induced by (OA) [Rupp, McChristian, Miller, Taboada & Cronnelly], 711  
pharmacokinetics of, applied to calculation of bolus and infusion dosage regimens (MI) [Shanks], 72  
and prophylactic nitroglycerin during coronary artery bypass surgery (OA) [Gallagher, Moore, Jose, Botros & Clark], 785
- succinylcholine**  
cerebral stimulation following, in dogs (OA) [Lanier, Milde & Michenfelder], 551  
failure of, to alter plasma potassium in children with myelomeningocele (CR) [Dierdorf, McNiece, Rao, Wolfe & Means], 272  
and open eye injury (CO) [Donlon], 525  
and open eye injury (CO) [Jantzen, Hackett & Earnshaw], 524  
and open eye injury (CO) [Libonati, Leahy & Ellison], 525  
in peripartum patients (OA) [Leighton, Cheek, Gross, Apfelbaum, Shantz, Gutsche & Rosenberg], 202
- tubocurarine**  
pharmacokinetics of, applied to calculation of bolus and infusion dosage regimens (MI) [Shanks], 72
- vecuronium**  
for muscle relaxation in patients with myasthenia gravis (CR) [Buzello, Noeldge, Krieg & Brobmann], 507  
neostigmine and edrophonium antagonism of varying intensity neuromuscular blockade induced by (OA) [Rupp, McChristian, Miller, Taboada & Cronnelly], 711  
pharmacokinetics of, applied to calculation of bolus and infusion dosage regimens (MI) [Shanks], 72  
priming dose of, pulmonary aspiration after (CR) [Musich & Walts], 517  
for rapid sequence endotracheal intubation (CR) [Lennon, Olson & Gronert], 510  
refining priming principle for, during rapid-sequence induction of anesthesia (OA) [Taboada, Rupp & Miller], 243  
sufentanil with, bradycardia and asystole following (CR) [Starr, Sethna & Estafanous], 521
- Neuromuscular transmission**  
influence of hypothermic cardiopulmonary bypass on, in absence of muscle relaxants (CR) [Buzello, Pollmaecher, Schluermann & Urbanyi], 279
- nerve stimulator**  
and electromyographic measurements, caution in making clinical recommendations based on (CO) [Kopman], 530  
and electromyographic measurements, caution in making clinical recommendations based on (CO) [Lee & Chen], 529
- Neuronal necrosis, *See under* Brain**
- Neurons, *See under* Spinal cord**
- Neurosurgical anesthesia, *See under* Anesthesia**
- Neurotransmitters**  
**acetylcholine**  
inhibition of, in physostigmine antagonism of flunitrazepam (OA) [Vatashsky, Beilin, Razin & Weinstock], 248
- Neutrophils, *See under* Blood; Infection**
- Nicotinic receptors, *See under* Receptors**
- Nitrogen, *See under* Gases, nonanesthetic**
- Nitroglycerin, *See under* Heart; Pharmacology; Sympathetic nervous system, sympatholytic agents**
- Nitroprusside, *See under* Anesthetic techniques, hypotension, induced**
- Nitrous oxide, *See under* Anesthetics, gases**
- Nonanesthetic gases, *See under* Gases**
- O**
- Obstetric anesthesia, *See under* Anesthesia**
- Occlusion pressure response, *See under* Carbon dioxide**
- Ocular surgery, *See under* Surgery**
- One-lung ventilation, *See under* Ventilation**
- Ophthalmic anesthesia, *See under* Anesthesia**
- Ophthalmology, *See under* Surgery**
- Opiate anesthesia, *See under* Anesthetic techniques**
- Organizations**  
Society for Neurosurgical Anesthesia and Neurologic Supportive Care Annual Meeting, October 11, 1985 (SM), 539
- Orotracheal anesthesia, *See under* Anesthetic techniques**
- Outpatient anesthesia, *See under* Anesthesia**
- Outpatient surgery, *See under* Surgery**
- Oximeter, *See under* Equipment**
- Oxygen, *See also under* Metabolism**  
**blood levels**  
effect of isoflurane and arterial oxygenation on, during one-lung ventilation (EV) [Benumof], 419  
and hypoxic pulmonary vasoconstriction in dogs, influence of isoflurane on (OA) [Domino, Borowec, Alexander, Williams, Chen, Marshall & Marshall], 423
- consumption**  
in endotracheal intubation in normal subjects and postoperative patients (OA) [Weissman, Askanazi, Rosenbaum, Damask, Hyman & Kinney], 353  
and resting metabolic rate of critically ill patient: measured versus predicted (OA) [Weissman, Kemper, Askanazi, Hyman & Kinney], 673
- oxyhemoglobin dissociation**  
curve in humans, isoflurane and (CO) [Lanza & Mercadante], 413
- toxicity**  
effects of, in rabbits, intravenous bleomycin does not alter (OA) [Matalon, Harper, Nickerson & Olszowka], 614  
increased N-pentane excretion in humans as consequence of (OA) [Morita, Snider & Inada], 730

- transcutaneous
  - for detection of air embolism in neurosurgical patients (OA) [Glenski & Cucchiara], 546
  - for detection of venous air embolism (OA) [Glenski, Cucchiara & Michenfelder], 541
- Oxygen consumption, *See under Metabolism*
- Oxygen consumption, cerebral, *See under Brain*
- Oxygen tension, *See under Brain*
- Oxygen toxicity, *See under Lung(s)*
- Oxyhemoglobin dissociation, *See under Oxygen*

## P

## Pain

- experimental
  - prolonged opioid antagonism with nalmefene during (OA) [Gal & DiFazio], 175
- management
  - epidural block for, facilitated by field block (CO) [Catchlove], 536
- measurement
  - prolonged opioid antagonism with nalmefene during (OA) [Gal & DiFazio], 175
- postoperative
  - methadone and morphine compared in control of (OA) [Gourlay, Willis & Lamberty], 322
  - morphine in, influence of naloxone on analgesia and respiratory depression following (OA) [Rawal, Schött, Dahlström, In-turisi, Tandon, Sjöstrand & Wennhager], 194

Pancuronium, *See under Neuromuscular relaxants*Papillary muscle, *See under Heart*

## Parasympathetic nervous system

- atropine
  - blockade with, in study of effects of inhalation anesthetics on atrioventricular conduction times in dogs (OA) [Atlee, Brownlee & Burstrom], 703

Pediatric anesthesia, *See under Anesthesia*PEEP, *See under Hemodynamics; Ventilation*Perforation, *See under Airway*Perfusion scans, *See under Heart*Peridural anesthesia, *See under Anesthetic techniques*Pharmacodynamics, *See also under Pharmacology*

- methadone
    - and morphine, compared in postoperative pain control (OA) [Gourlay, Willis & Lamberty], 322
  - morphine
    - and methadone, compared in postoperative pain control (OA) [Gourlay, Willis & Lamberty], 322
  - succinylcholine
    - in peripartum patients (OA) [Leighton, Cheek, Gross, Apfelbaum, Shantz, Gutsche & Rosenberg], 202
- Pharmacokinetics**
- clonidine
    - rectal, in perioperative period (CR) [Johnston, Nicholas, Lawson, Wallfisch & Arens], 288
  - dantrolene, and unexpected hyperthermia manifesting during out-patient anesthesia (CR) [Braude, Press, Moyes, Isaacs, Dan-ilewitz & Kolb], 647
  - droperidol
    - in anesthetized patients (OA) [Fischler, Bonnet, Trang, Jacob, Levron, Flaisler & Vourc'h], 486
  - fentanyl
    - in patients undergoing abdominal aortic surgery (OA) [Hudson, Thomson, Cannon, Friesen & Meatherall], 334

## kinetics

- of nondepolarizing neuromuscular relaxants applied to calculation of bolus and infusion dosage regimens (MI) [Shanks], 72

## sufentanil

- potency of (CO) [Goldberg & McKenna], 667
- potency of (CO) [Griffiths], 667
- potency of (CO) [Hilberman & Hyer], 665

## Pharmacology

## cimetidine

- intravenous, in intensive care unit patients (CR) [Iberti, Paluch, Helmer, Murgolo & Benjamin], 87

## clonidine

- and fentanyl requirements (OA) [Ghignone, Quintin, Duke, Kehler & Calvillo], 36

## digoxin

- effect on cardiac and skeletal muscle metabolism in malignant hyperthermia susceptible swine (OA) [Gronert, Ahern, Milde & White], 24

## dose-response

- of nondepolarizing neuromuscular relaxants applied to calculation of bolus and infusion dosage regimens (MI) [Shanks], 72

## drug interactions

- in calcium blocking drugs and anesthetics in chronically instrumented dogs (OA) [Chelly, Rogers, Hysing, Taylor, Hartley & Merin], 560
- in calcium blocking drugs and anesthetics in chronically instrumented dogs (OA) [Rogers, Hysing, Merin, Taylor, Hartley & Chelly], 568

## esmolol

- heart rate and blood pressure effects of, after ketamine induction and intubation (OA) [Gold, Brown, Coverman & Herring-ton], 718

## flunarizine

- ameliorates ischemic brain damage in rat (OA) [Deshpande & Wieloch], 215

## furosemide

- may be detrimental in treatment of pulmonary edema (CO) [Ebert, Grimes & Niemann], 299
- may be detrimental in treatment of pulmonary edema (CO) [Ly-don], 298

## hydralazine

- and gas exchange in dog oleic-acid lung injury (OA) [Bishop & Cheney], 435

## minoxidil

- and gas exchange in dog oleic-acid lung injury (OA) [Bishop & Cheney], 435

## nitroglycerin

- cardiac output effects of, in experimental lung injury (CO) [Pearl & Rosenthal], 129
- intravenous, to prevent intraoperative myocardial ischemia during noncardiac surgery (CO) [Coriat], 409
- for use in preeclampsia (CO) [Sosis & Leighton], 657

## pharmacodynamics

- of nondepolarizing neuromuscular relaxants applied to calculation of bolus and infusion dosage regimens (MI) [Shanks], 72

## phenylephrine eyedrops

- and anesthesia (CR) [Van Der Spek & Hantler], 812

## trimethaphan

- for use in preeclampsia (CO) [Sosis & Leighton], 657

## vasoconstrictor

- and anesthesia (CR) [Van Der Spek & Hantler], 812

## verapamil

- and isoflurane, combined effects of, on coronary blood flow and myocardial metabolism (OA) [Campos & Kapur], 778

Phenylephrine, *See under Sympathetic nervous system*

**Phenylephrine eyedrops**, *See under Pharmacology*  
**Physostigmine**, *See under Antagonists, neuromuscular relaxants*  
**Pichlmayr, I., Lips, U., and Kunkel, H.**  
*The Electroencephalogram in Anesthesia* (BR), 304  
**Pneumothorax**, *See under Complications*  
**Podiatry**, *See under Surgery*  
**Polymorphous ventricular tachycardia**, *See under Heart*  
**Position**  
    effects  
        cardiovascular  
            in young boy (CR) [Schroeder & Jebson], 377  
    hypotension  
        supine, syndrome of, in young boy (CR) [Schroeder & Jebson], 377  
    prone  
        head and chin cushioned face-rest for surgery in (CO) [Ray], 301  
    sitting  
        and hemodynamic effects of positive end-expiratory pressure during continuous venous air embolism in dog (OA) [Pearl & Larson], 724  
        for monitoring of neurosurgical patients for detection of air embolism (OA) [Glenski & Cucchiara], 546  
        subclavian vein catheter as source of air emboli in (CO) [Kloosterboer, Springman & Coursin], 411  
**Positive end-expiratory pressure**, *See under Ventilation*  
**Postoperative pain**, *See under Pain*  
**Potassium**, *See under Ions*  
**Potency**  
    single *versus* divided doses of atracurium (CR) [Weinberg, Stirt & Longnecker], 111  
**Preeclampsia**, *See under Complications; Pregnancy*  
**Pregnancy**, *See also under Anesthesia*  
    preeclampsia  
        defense of trimethaphan for use in (CO) [Sosis & Leighton], 657  
    teratogenicity  
        studies of, of nitrous oxide, halothane, isoflurane, and enflurane in Sprague-Dawley rats (OA) [Mazze, Fujinaga, Rice, Harris & Baden], 339  
**Preload**, *See under Heart*  
**Prematurity**, *See under Age factors*  
**Premedication**  
    clonidine  
        and fentanyl requirements (OA) [Ghignone, Quintin, Duke, Kehler & Calvillo], 36  
**Priming principle**, *See under Anesthetic techniques*  
**Prone position**, *See under Position*  
**Propranolol**, *See under Sympathetic nervous system*  
**Protection, cerebral**, *See under Brain*  
**Protein**, *See also under Muscle*  
    muscle, electrophoresis of, is not method for diagnosis of malignant hyperthermia susceptibility (OA) [Walsh, Brownell, Littmann & Paasuke], 473  
**Prys-Roberts, C., and Hug, C. C., Jr. (eds.)**  
*Pharmacokinetics of Anaesthesia* (BR), 671  
**Pulmonary artery catheter**, *See under Complications; Equipment; Monitoring*  
**Pulmonary artery perforation**, *See under Complications*  
**Pulmonary artery pressure**, *See under Monitoring*  
**Pulmonary artery wedge pressure**, *See under Blood pressure*  
**Pulmonary capillary wedge pressure**, *See under Blood pressure*  
**Pulmonary edema**, *See under Complications; Lung(s)*  
**Pulmonary vascular response**, *See under Hypoxia*  
**Pulse oximeter**, *See under Equipment*  
**Pulse oximetry**, *See under Measurement techniques*

**Pulse rate**, *See under Heart*  
**Puncture**, *See under Anesthetic techniques*

## R

**Radiation therapy**, *See under Anesthesia*  
**Rapid sequence anesthesia**, *See under Anesthetic techniques*  
**Rate response**, *See under Heart*  
**Raynaud's phenomenon**, *See under Sympathetic nervous system*  
**Real-time ultrasonic guidance**, *See under Equipment; Monitoring*  
**Receptors**  
    acetylcholine  
        from *Torpedo californica*, actions of general anesthetics on (OA) [Firestone, Sauter, Braswell & Miller], 694  
    adrenergic  
        isoflurane, interaction in isolated rat parotid gland (OA) [Östman, Henriksson, Sundström & Reiz], 734  
    benzodiazepinase  
        and physostigmine antagonism of flunitrazepam (OA) [Vatashsky, Beilin, Razin & Weinstock], 248  
    nicotinic  
        halothane inhibits, in primary culture of bovine adrenal medulla cells (OA) [Yashima, Wada & Izumi], 466  
**Records**  
    anesthesia  
        computerized, may be dangerous (CO) [Noel], 300  
**Recovery**  
    adverse respiratory events occurring in recovery room after general anesthesia (CR) [Beard, Jick & Walker], 269  
**Reflexes**  
    baroreceptor  
        influence of venous return on, during lumbar epidural anesthesia (OA) [Baron, Decaux-Jacolot, Edouard, Berdeaux & Samii], 188  
    baroreflex  
        effects of lidocaine on, in conscious dogs (OA) [Edouard, Berdeaux, Langlois, Samii, Giudicelli & Noviant], 316  
**Regional anesthesia**, *See under Anesthetic techniques*  
**Renal clearance**, *See under Kidney*  
**Renal failure**, *See under Kidney*  
**Renin-angiotensin**, *See under Hormones*  
**Reports of scientific meetings**, *See under Organizations*  
**Research**  
    animal rights  
        and biomedical research (EV) [Shapiro], 142  
**Resistance**, *See under Airway; Ventilation*  
**Respiratory acidosis**, *See under Acid-base equilibrium*  
**Respiratory alkalosis**, *See under Acid-base equilibrium*  
**Respiratory depression**, *See under Analgesics, narcotic; Brain; Ventilation*  
**Respiratory quotient**, *See under Metabolism*  
**Rhinoscope**, *See under Equipment*  
**Right atrial pressure**, *See under Monitoring*  
**Rigidity**, *See under Muscle*

## S

**Scavengers**, *See under Equipment*  
**Seizures**, *See under Brain*  
**Shunt**, *See under Hypoxia; Lung(s)*  
**Shunting**, *See under Lung(s)*  
**Silverman, W. A.**  
*Human Experimentation*, (BR), 848  
**Sitting position**, *See under Position*  
**Skeletal muscle**, *See under Muscle*

**Smooth muscle, See under Muscle**

**Society for Neurosurgical Anesthesia and Neurologic Supportive  
Care, See under Organizations**

**Sore throat, See under Complications**

**Spinal anesthesia, See under Anesthetic techniques**

**Spinal cord**

**neurons**

**WDR**

spinal sufentanil effects on (OA) [Aoki, Senami, Kitahata & Collins], 225

pain coding (OA) [Yaksh, Harty & Onofrio], 590

**Spinal narcotics, See under Anesthetic techniques**

**Stellate block, See under Anesthetic techniques**

**Stroke, See under Brain; Complications**

**Succinylcholine, See under Neuromuscular relaxants; Pharmacodynamics**

**Suctioning, See under Airway**

**Sufentanil, See under Analgesics, narcotic; Anesthetics, intravenous;  
Pharmacokinetics**

**Surgery**

**aorta**

pharmacokinetics of fentanyl in patients undergoing (OA) [Hudson, Thomson, Cannon, Friesen & Meatherall], 334

**bronchoscopy**

laser perforation following (CR) [Emery], 120

**cardiac**

elective, without pulmonary artery catheter monitoring (CO) [Liban & Davies], 664

heparin resistance prior to (CR) [Anderson], 504

in myocardial ischemia with halothane administration in coronary stenosis (OA) [Buffington], 632

neuropsychiatric complications after, cerebral protection by barbiturate (OA) [Nussmeier, Arlund & Slogoff], 165

pancuronium in, and myocardial ischemia (CO) [Levy], 659

pancuronium in, and myocardial ischemia (CO) [Thomson & Putnins], 660

polymorphous ventricular tachycardia during (CR) [Weiskopf & Stead], 392

pulmonary artery catheter migration during (CR) [Johnston, Royster, Choplin, Howard, Mills & Tucker], 258

pulmonary hypertension and noncardiogenic pulmonary edema following (CR) [Latson, Kickler & Baumgartner], 106

**cardiovascular**

hypothermic, response of cerebral blood flow to changes in carbon dioxide tension during (OA) [Prough, Stump, Roy, Gravlee, Williams, Mills, Hinshelwood & Howard], 576

poor correlation between pulmonary arterial wedge pressure and left ventricular end-diastolic volume after (OA) [Hansen, Viquerat, Matthay, Wiener-Kronish, DeMarco, Bahtia, Marks, Botvinick & Chatterjee], 764

prophylactic nitroglycerin infusions during (OA) [Gallagher, Moore, Jose, Botros & Clark], 785

**carotid endarterectomy**

transconjunctival O<sub>2</sub> and cerebral blood flow during (CR) [Gibson, McMichan & Cucchiara], 277

**eye**

and succinylcholine and open eye injury (CO) [Donlon], 525

and succinylcholine and open eye injury (CO) [Jantzen, Hackett & Earnshaw], 524

and succinylcholine and open eye injury (CO) [Libonati, Leahy & Ellison], 525

**laser**

perforation of main stem bronchus (CR) [Emery], 120

**neurologic**

intraoperative glucose during (OA) [Sieber, Smith, Kupferberg, Crosby, Uzzell, Buzby, March & Nann], 453

**ophthalmology**

patient movement during anesthesia in, unusual cause of (CR) [Adragna], 89

**outpatient**

comparison of alfentanil with fentanyl for (CR) [White, Coe, Shafer & Sung], 99

**podiatry**

intravenous regional anesthesia for (CR) [Nusbaum & Hamelberg], 91

**position for**

head and chin cushioned face-rest for (CO) [Ray], 301

**thoracic**

high-frequency, small-volume ventilation during (OA) [Glenski, Crawford & Rehder], 211

**vascular**

pharmacokinetics of fentanyl in patients undergoing (OA) [Hudson, Thomson, Cannon, Friesen & Meatherall], 334

**Surgical anesthesia, See under Anesthesia**

**Sympathetic block, See under Anesthetic techniques**

**Sympathetic nervous system**

**adrenal medulla**

halothane inhibition of receptor-mediated calcium influx in primary culture of cells of (OA) [Yashima, Wada & Izumi], 466

**adrenergic receptors**

isoflurane, interaction in isolated rat parotid gland (OA) [Östman, Henriksson, Sundström & Reiz], 734

**alpha-adrenergic agonist**

**clonidine**

premedication and fentanyl requirements (OA) [Ghignone, Quintin, Duke, Kehler & Calvillo], 36

**beta-adrenergic blocker**

heart rate and blood pressure effects of, after ketamine induction and intubation (OA) [Gold, Brown, Coverman & Herring-ton], 718

**beta-adrenergic receptors**

blockade, and tolerance to potassium (CO) [Torretti, Gerson, Oats & Lange], 846

**catecholamines**

and  $\beta$ -adrenoceptor blockade and tolerance to potassium (CO) [Torretti, Gerson, Oats & Lange], 846

and halothane inhibition of receptor-mediated calcium influx (OA) [Yashima, Wada & Izumi], 466

maternal and fetal effects of, in gravid ewes (OA) [Hood, Dewan & James], 610

test dose of, epidural injection of, monitoring maternal heart rate during (CO) [Chestnut & Wiener], 839

**uptake**

neuronal and extraneuronal, differential effects of ketamine isomers on (LR) [Lundy, Lockwood, Thompson & Frew], 359

**clonidine**

rectal, in perioperative period (CR) [Johnston, Nicholas, Lawson, Wallfisch & Arens], 288

effects of meperidine spinal anesthesia on (CR) [Cozian, Pinaud, Lepage, Lhoste & Souron], 815

**epinephrine**

maternal and fetal effects of, in gravid ewes (OA) [Hood, Dewan & James], 610

test dose of, epidural injection of, monitoring maternal heart rate during (CO) [Chestnut & Wiener], 839

- esmolol**  
heart rate and blood pressure effects of, after ketamine induction and intubation (OA) [Gold, Brown, Coverman & Herring-ton], 718
- Horner syndrome**  
incidence of, with interscalene brachial plexus block and man-agement of head injury (CO) [Al-Khafaji & Ellias], 127
- phenylephrine**  
in comparative study, of dilation of nasal passage (CR) [Sessler, Vitaliti, Cooper, Jones, Powell & Pesko], 274  
and plasma levels of lidocaine, effects of, on heart in conscious dogs (OA) [Edouard, Berdeaux, Langlois, Samii, Giudicelli & Noviant], 316
- propranolol**  
blockade with, in study of effects of inhalation anesthetics on atrioventricular conduction times in dogs (OA) [Atlee, Brownlee & Burstrom], 703
- Raynaud's phenomenon**  
neurolytic lumbar sympathetic block in treatment of (CR) [Skeehan & Cory], 119
- sympatholytic agents**  
**nitroglycerin**  
improves venous cannulation (CO) [Moore], 533
- T**
- Tamponade, See under Heart**
- Temperature**  
**body**  
passive heat and moisture exchangers, do they keep the patient warm? (CR) [Haslam & Nielsen], 379
- heating**  
and simple method for warming intravenous fluid in infants (CO) [Rosen, Rosen & Broadman], 133
- Teratogenicity, See under Pregnancy; Toxicity**
- Teratology, See under Anesthesia; Toxicity**
- Tetracaine, See under Anesthetics, local**
- Theories of anesthesia**  
and actions of general anesthetics on acetylcholine receptor-rich membranes from *Torpedo californica* (OA) [Firestone, Sauter, Braswell & Miller], 694  
dual effect of local anesthetics on rhodopsin (OA) [Mashimo, Abe & Yoshiya], 447  
and membrane fluidizing effect of anesthetics (OA) [Ueda, Hirakawa, Arakawa & Kamaya], 67
- Thermodilution, See under Measurement techniques**
- Thermodilution determination, See under Heart**
- Thiamylal, See under Anesthetics, intravenous**
- Thiopental, See under Anesthetics, intravenous**
- Thoracic anesthesia, See under Anesthesia**
- Thoracic surgery, See under Surgery**
- Thyroid, See under Hormones**
- Tolerance to analgesics, See under Analgesics**
- Tongue, See under Airway**
- Toxicity**  
**anesthetics**  
cell proliferation in developing brain after brief anesthetic exposure (OA) [Rodier, Aschner, Lewis & Koeter], 680
- bleomycin**  
intravenous, does not alter toxic effects of hyperoxia in rabbits (OA) [Matalon, Harper, Nickerson & Olszowka], 614
- carcinogenicity**  
and carcinogen bioassay of nitrous oxide in mice (OA) [Baden, Kundomal, Luttrupp, Mazze & Kosek], 747
- fetal**  
of nitrous oxide, halothane, isoflurane, and enflurane in Sprague-Dawley rats (OA) [Mazze, Fujinaga, Rice, Harris & Baden], 339
- free radicals**  
increased N-pentane excretion in humans as consequence of (OA) [Morita, Snider & Inada], 730
- lidocaine**  
depresses synaptic activity in rat hippocampal slice (LR) [Schurr, Spears, Reid, West, Edmonds & Rigor], 501  
seizures induced by, local cerebral blood flow during (OA) [Tommasino, Maekawa & Shapiro], 771
- local anesthetics**  
altered perineurial permeability, edema, and nerve fiber injury (OA) [Myers, Kalichman, Reisner & Powell], 29  
for obstetrics, efficacy of 1.5% lidocaine with 7.5% dextrose and epinephrine as test dose (CR) [Abraham, Harris, Maxwell & Kaplow], 116
- oxygen**  
effects of, in rabbits, intravenous bleomycin does not alter (OA) [Matalon, Harper, Nickerson & Olszowka], 614  
increased N-pentane excretion in humans as consequence of (OA) [Morita, Snider & Inada], 730
- teratogenicity**  
after brief exposure to nitrous oxide or halothane (OA) [Rodier, Aschner, Lewis & Koeter], 673  
cell proliferation in developing brain after brief anesthetic exposure (OA) [Rodier, Aschner, Lewis & Koeter], 590  
studies of, of nitrous oxide, halothane, isoflurane, and enflurane in Sprague-Dawley rats (OA) [Mazze, Fujinaga, Rice, Harris & Baden], 339
- Trachea, See under Lung(s)**
- Transconjunctival O<sub>2</sub> monitoring, See under Monitoring**
- Transcutaneous carbon dioxide, See under Carbon dioxide**
- Transcutaneous oxygen, See under Oxygen**
- Transesophageal echocardiography, See under Monitoring**
- Tricuspid regurgitation, See under Heart**
- Trimethaphan, See under Pharmacology**
- Tubes, See under Equipment**
- Tubocurarine, See under Neuromuscular relaxants**
- T-wave abnormalities, See under Heart**
- U**
- Unconsciousness, See under Brain**
- Uterus**  
**blood flow**  
and maternal and fetal effects of epinephrine in gravid ewes (OA) [Hood, Dewan & James], 610
- V**
- Vaporizers, See under Equipment**
- Vascular pressures, See under Heart**
- Vascular resistance, See under Lung(s)**
- Vascular surgery, See under Surgery**
- Vasoconstrictors, See under Pharmacology**
- Vasopressin, See under Hormones**
- Vecuronium, See under Neuromuscular relaxants**
- Veins**  
**cannulation**  
nitroglycerin improves (CO) [Moore], 533



- fistula**  
unexpected, in arm of intravenous drug abuser (CO) [Greene], 842
- jugular**  
**complications**  
in external cannulation (CO) [Hey, Mahood & Pietak], 836  
external cannulation of, complications in (CO) [Hey, Mahood & Pietak], 836  
internal, real-time ultrasonic guidance for percutaneous puncture of (CO) [Yonei, Nonoue & Sari], 830
- venipuncture**, nitroglycerin improves (CO) [Moore], 533
- venous return**  
influence of, on baroreflexes during epidural anesthesia (OA) [Baron, Decaux-Jacolot, Edouard, Berdeaux & Samii], 188
- Venipuncture**, *See under Veins*
- Venous entrapment**, *See under Complications*
- Venous return**, *See under Veins*
- Ventilation**  
**airway occlusion pressure**  
in prolonged opioid antagonism with nalmefene (OA) [Gal & DiFazio], 175
- carbon dioxide response**  
in prolonged opioid antagonism with nalmefene (OA) [Gal & DiFazio], 175
- depression**  
influence of naloxone on, following epidural morphine (OA) [Rawal, Schött, Dahlström, Inturrisi, Tandon, Sjöstrand & Wennhager], 194
- drug effects**  
in response to diazepam (OA) [Bailey, Andriano, Goldman, Stanley & Pace], 460  
effect of, on baseline pulmonary artery temperature (CO) [Gravlee & Johnston], 293
- end-expiratory pressure**  
in canine model of bronchopleural fistula (OA) [Mayers, Long, Breen & Wood], 739
- frequency**  
in relation to alfentanil concentration in unanesthetized dogs (OA) [Arndt, Bednarski & Parasher], 345
- gas exchange**  
in relation to alfentanil concentration in unanesthetized dogs (OA) [Arndt, Bednarski & Parasher], 345  
during thoracic surgery (OA) [Glenski, Crawford & Rehder], 211
- high frequency oscillatory**  
in canine model of bronchopleural fistula (OA) [Mayers, Long, Breen & Wood], 739
- high-frequency**  
during thoracic surgery (OA) [Glenski, Crawford & Rehder], 211
- intermittent positive pressure**  
in canine model of bronchopleural fistula (OA) [Mayers, Long, Breen & Wood], 739
- mechanical**  
during thoracic surgery (OA) [Glenski, Crawford & Rehder], 211
- monitoring**  
*See under Monitoring*
- nasal resistance**  
comparison of 4% lidocaine/0.5% phenylephrine with 5% cocaine and (CR) [Sessler, Vitaliti, Cooper, Jones, Powell & Pesko], 274
- pattern**  
for continuous inspiratory resistive and elastic loads during halothane anesthesia (OA) [Moote, Knill & Clement], 582
- pattern of breathing**  
and effect of halothane on diaphragmatic function (OA) [Clerque, Viïres, Lemesle, Aubier, Viars & Pariente], 181
- PEEP**  
hemodynamic effects of, during continuous venous air embolism in dog (OA) [Pearl & Larson], 724
- positive end-expiratory pressure**  
hemodynamics effects of (CO) [Berry], 130  
hemodynamics effects of (CO) [Venus, Mathru & Smith], 131
- resistance**  
continuous, and elastic loads during halothane anesthesia (OA) [Moote, Knill & Clement], 582  
tubular, response to, in normal subjects and postoperative patients (OA) [Weissman, Askanazi, Rosenbaum, Damask, Hyman & Kinney], 353
- work**  
tubular, response to, in normal subjects and postoperative patients (OA) [Weissman, Askanazi, Rosenbaum, Damask, Hyman & Kinney], 353
- Ventilators**, *See under Equipment*
- Ventilatory response**, *See under Carbon dioxide*
- Ventricular function**, *See under Heart*
- Verapamil**, *See under Ions, calcium blocker; Pharmacology*
- Volatile anesthetics**, *See under Anesthetics*
- Volume, cardiac**, *See under Heart*
- W**
- Water, pulmonary**, *See under Lung(s)*
- WDR neurons**, *See under Spinal cord*
- Z**
- Zapol, W. M., and Falke, K. J.,**  
*Acute Respiratory Failure* (BR), 136
